# Supplementary material for: Morphological and optical properties of carbonaceous aerosol particles from ship emissions and biomass burning during a summer cruise measurement in the South China Sea
Source: Copernicus journal article supplement (doi:10.5194/egusphere-2023-1589), 2023-07-31
Supplement: Supplementary file 1 [file egusphere-2023-1589-supplement-version3.pdf]

1 Supporting Information for

2 **Morphological and optical properties of carbonaceous aerosol particles from ship**  
3 **emissions and biomass burning during a summer cruise measurement in the South China**  
4 **Sea**

5 **Cuizhi Sun<sup>1</sup>, Yongyun Zhang<sup>1</sup>, Baoling Liang<sup>1,&</sup>, Min Gao<sup>1</sup>, Xi Sun<sup>1,#</sup>, Fei Li<sup>1,4</sup>, Xue Ni<sup>1</sup>, Qibin**  
6 **Sun<sup>1</sup>, Hengjia Ou<sup>1</sup>, Dexian Chen<sup>1</sup>, Shengzhen Zhou<sup>1,2,3\*</sup>, and Jun Zhao<sup>1,2,3\*</sup>**

7 <sup>1</sup> School of Atmospheric Sciences, Guangdong Province Key Laboratory for Climate Change  
8 and Natural Disaster Studies, and Southern Marine Science and Engineering Guangdong  
9 Laboratory (Zhuhai), Sun Yat-sen University, Zhuhai, Guangdong 519082, China

10 <sup>2</sup> Guangdong Provincial Observation and Research Station for Climate Environment and Air Quality  
11 Change in the Pearl River Estuary, Zhuhai, Guangdong 519082, China

12 <sup>3</sup> Key Laboratory of Tropical Atmosphere-Ocean System, Ministry of Education, Zhuhai, Guangdong  
13 519082, China

14 <sup>4</sup> Xiamen Key Laboratory of Straits Meteorology, Xiamen Meteorological Bureau, Xiamen, Fujian  
15 361012, China

16 <sup>&</sup> Now at Guangzhou Environmental Monitoring Center, Guangzhou, Guangdong 510060,  
17 China

18 <sup>#</sup> Now at Centre for Isotope Research (CIO), Energy and Sustainability Research Institute  
19 Groningen (ESRIG), University of Groningen, Groningen 9747 AG, the Netherlands

20 *Correspondence to:* Jun Zhao (zhaojun23@mail.sysu.edu.cn) and Shengzhen Zhou  
21 (zhoushz3@mail.sysu.edu.cn)

22 This supplement contains 12 sections, 1 table, and 16 figures.

23

24 1. Calculation of the cut size diameter of the TEM sampler

25 A single-stage cascade impactor, equipped with a jet nozzle of 0.3 mm in diameter, was used  
26 for single particle sampling. The Stokes number is defined in Eqs. (1–2) (Marple and Olson,  
27 2011). The cut-size diameter, which is defined as the diameter corresponding to a 50%  
28 collection efficiency, can be derived using Eq. (3).

29

30 
$$Stk = \frac{\rho_p C_c d_p^2 U}{9\eta W} \quad (1)$$

31 
$$U = \frac{Q}{\pi(\frac{W}{2})^2} \quad (2)$$

32 
$$d_{p_{50}} = \sqrt{Stk_{50}} \sqrt{\frac{9\eta\pi W^3}{4\rho_p C_c Q}} \quad (3)$$

33

34 where  $Stk$  is Stokes number, and the square root of the  $Stk$  corresponding to 50% collection  
35 efficiency ( $\sqrt{Stk_{50}}$ ) is 0.47 assumed a jet Reynolds number of 3000;  $\rho_p$  is particle density  
36 assumed as  $1.5 \text{ g cm}^{-3}$ ;  $C_c$  is Cunningham's slip correction factor, approximately 1;  $\eta$  is air (or  
37 gas) viscosity,  $1.8134 \times 10^{-5} \text{ Pa}\cdot\text{s}$  at 293 K, a constant under normal atmospheric condition.  $U$   
38 represents the average air (or gas) velocity at the nozzle exit;  $Q$  is the volumetric flow rate  
39 through the nozzle and is equal to  $1 \text{ L min}^{-1}$ ;  $W$  is the nozzle diameter and is 0.3 mm;  $d_{p_{50}}$  is  
40 the cut point particle diameter at the 50% collection efficiency.

41 2. Single particle analysis using the ImageJ's plugin

42 Figure S1 shows examples of TEM images using the software program ImageJ for single  
43 particle analysis. Figure S1a is captured before beam focus, which is subsequently used for  
44 single particle analysis in Figure S1b. However, particles No. 2 and No. 13 (indicated by the  
45 red arrow) were manually excluded from the statistical analysis due to overcounting. In  
46 Figure S1c, volatile components were vaporized after beam focus, leaving nonvolatile  
47 compositions such as BC residual on the substrate (e.g., particles indicated by the blue  
48 arrow). The outline of BC aggregates was extracted using ImageJ's Frac Lac plugin (deep  
49 ImageJ) for fractal dimension calculation, which is based on the boxing counting method, for  
50 example, the image inside the blue rectangle on the lower right corner of Figure S1c.

51 In the boxing counting method, the theoretical basis for  $D_f$  calculation is following Eq. (4).

52 
$$D_f = \frac{\ln N}{\ln \varepsilon} \quad (4)$$

53 where  $D_f$  is fractal dimension,  $N$  is the number of the primary monomers of the aggregate,  $\varepsilon$   
54 is the scale factor relating to the radius of gyration, the average radius of the monomer and  
55 fractal prefactor (Sorensen and Roberts, 1997).

56 Lacunarity measures gap and heterogeneity to complement fractal dimensions in  
57 describing complexity. It uses box mass instead of box count as mentioned in the Fraclac  
58 guidelines in the ImageJ software. The Fraclac calculates  $L$  from the pixel distribution in the  
59 TEM binary image.

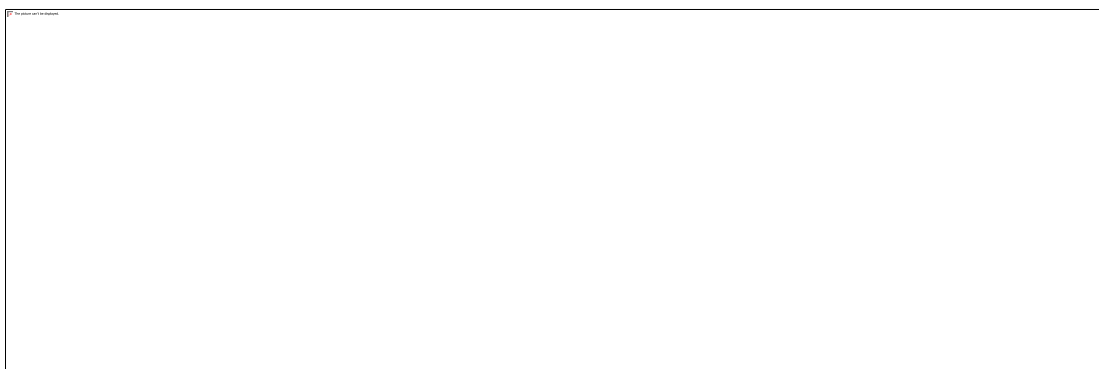

60

61 **Figure S1.** Example images of the single particle analysis using ImageJ's plugin: (a) Before  
62 beam focus in the TEM image, (b) particles marked with numbers in yellow using ImageJ, and  
63 (c) after beam focus in the TEM image.

### 64 3. Meteorological data for single particle sampling during navigation and stop

65 The time series of ship heading, relative wind direction (RWD), and relative wind speed  
66 (RWS) with a 3-sec time resolution in the South China Sea during the campaign (May 05–  
67 June 09, 2021) is shown in Figure S2. The RWD and RWS varied considerably and frequently  
68 due to the operational starts and stops (halts) of the ship for other tasks. The 10-min  
69 averaged RWD and RWS data were determined based on vector calculations. Detailed  
70 meteorological data, encompassing the 10-min average for single particle sampling during  
71 navigation and stop, are listed in Table S1. The sampling location for single particle sampling  
72 is shown in Figure S3.

73 Note that the samples collected during navigation were free from interference from the  
74 own ship emission due to high relative wind speeds ( $>5 \text{ m s}^{-1}$ ) and appropriate relative wind  
75 directions ( $0^\circ\text{--}80^\circ$ ,  $280^\circ\text{--}360^\circ$ ). Samples collected with wind speeds below  $5 \text{ m s}^{-1}$  or at  
76 relative wind direction in the range of  $80^\circ\text{--}280^\circ$  were air masses mixed with the own ship  
77 emissions.

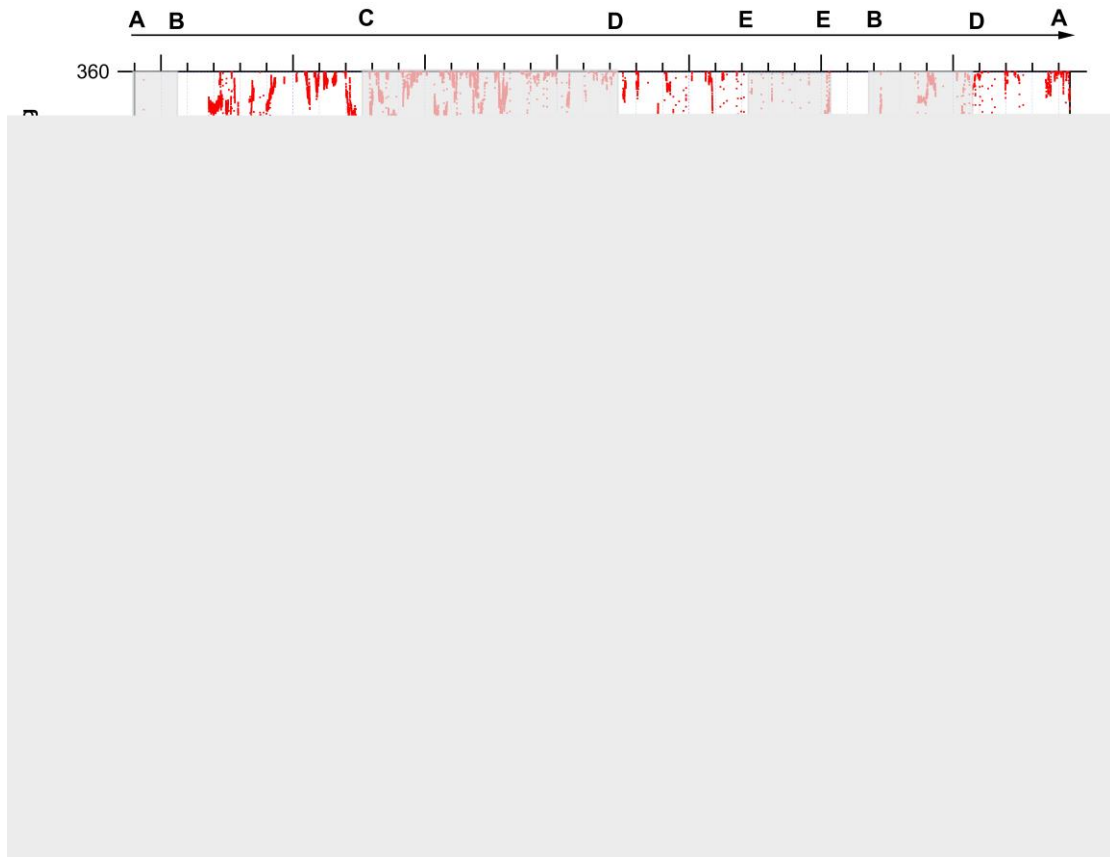

78

79 **Figure S2.** Time series of ship heading, relative wind direction (RWD), and relative wind  
 80 speed (RWS) during the campaign in the South China Sea (SCS). The shaded and unshaded  
 81 areas sequentially indicate the cruise routes from A to B, B to C, C to D, D to E, E (ship stop), E  
 82 to B, B to D, and D to A, as marked in Figure 1 in the main text.

83 **Table S1.** Meteorological data on the 10-min average single particle sampling during  
 84 navigation and stop.

| Serial number | Sampling start time | P (hPa)      | RH (%)     | S.R. ( $W m^{-2}$ ) | Temp. ( $^{\circ}C$ ) | RWS* ( $m s^{-1}$ ) | RWD* ( $^{\circ}$ ) |
|---------------|---------------------|--------------|------------|---------------------|-----------------------|---------------------|---------------------|
| N1            | 2021/5/10 11:18     | 1008.3 ± 0.0 | 81.0 ± 0.7 | 961.9 ± 42.4        | 29.7 ± 0.0            | 10.5 ± 0.6          | 341.7 ± 50.7        |
| N2            | 2021/5/11 8:24      | 1007.9 ± 0.0 | 83.3 ± 0.5 | 491.6 ± 10.1        | 28.9 ± 0.1            | 9.8 ± 0.5           | 320.2 ± 46.7        |
| N3            | 2021/5/11 19:00     | 1006.6 ± 0.1 | 75.5 ± 0.5 | -                   | 29.7 ± 0.0            | 6.4 ± 0.8           | 336.1 ± 21.1        |
| N4            | 2021/5/12 8:13      | 1007.5 ± 0.1 | 78.8 ± 0.6 | 474.5 ± 32.9        | 29.4 ± 0.1            | 7.0 ± 0.4           | 327.7 ± 53.1        |
| N5            | 2021/5/15 19:15     | 1006.6 ± 0.0 | 77.8 ± 1.9 | -                   | 30.2 ± 0.1            | 6.2 ± 0.7           | 60.1 ± 37.2         |
| N6            | 2021/5/16 12:35     | 1007.5 ± 0.0 | 76.9 ± 0.7 | 989.8 ± 13.2        | 29.8 ± 0.0            | 10.8 ± 0.7          | 340.3 ± 59.0        |
| N7            | 2021/5/17 14:40     | 1006.6 ± 0.0 | 72.2 ± 0.9 | 758.7 ± 7.7         | 30.0 ± 0.0            | 10.0 ± 0.6          | 16.9 ± 47.7         |
| N8            | 2021/5/18 8:47      | 1009.3 ± 0.0 | 79.3 ± 0.5 | 647.1 ± 68.5        | 30.1 ± 0.0            | 7.3 ± 0.5           | 12.3 ± 59.7         |

|     |                 |              |            |               |            |            |              |
|-----|-----------------|--------------|------------|---------------|------------|------------|--------------|
| N9  | 2021/5/18 18:10 | 1007.0 ± 0.0 | 75.8 ± 0.4 | 28.5 ± 6.1    | 30.7 ± 0.0 | 5.3 ± 0.4  | 14.2 ± 50.4  |
| N10 | 2021/5/21 16:16 | 1006.2 ± 0.1 | 74.0 ± 0.5 | 244.8 ± 62.2  | 30.2 ± 0.0 | 6.0 ± 1.2  | 16.8 ± 29.5  |
| N11 | 2021/5/22 15:32 | 1005.3 ± 0.0 | 82.1 ± 0.7 | 551.3 ± 140.5 | 28.5 ± 0.1 | 6.3 ± 1.0  | 57.4 ± 19.6  |
| N12 | 2021/5/27 8:55  | 1009.2 ± 0.0 | 76.1 ± 0.7 | 666.6 ± 16.4  | 29.8 ± 0.1 | 7.0 ± 0.4  | 291.8 ± 45.9 |
| N13 | 2021/6/1 18:07  | 1004.7 ± 0.0 | 76.1 ± 0.3 | 78.6 ± 14.6   | 30.3 ± 0.0 | 8.0 ± 0.5  | 40.0 ± 45.2  |
| N14 | 2021/6/3 10:50  | 1005.4 ± 0.1 | 77.9 ± 0.7 | 151.9 ± 6.7   | 30.1 ± 0.0 | 10.1 ± 0.5 | 313.2 ± 61.3 |
| N15 | 2021/6/8 10:18  | 1008.8 ± 0.0 | 86.2 ± 0.4 | 259.7 ± 40.5  | 28.4 ± 0.1 | 5.1 ± 0.7  | 58.6 ± 19.7  |
| S1  | 2021/5/9 14:36  | 1007.2 ± 0.0 | 74.6 ± 0.5 | 739.4 ± 164.0 | 29.4 ± 0.1 | 1.8 ± 0.7  | 242.4 ± 62.3 |
| S2  | 2021/5/9 15:30  | 1006.6 ± 0.1 | 75.3 ± 0.8 | 686.9 ± 32.3  | 29.5 ± 0.2 | 3.0 ± 0.6  | 238.5 ± 42.3 |
| S3  | 2021/5/13 9:07  | 1006.6 ± 0.0 | 77.1 ± 0.6 | 709.6 ± 12.6  | 30.4 ± 0.0 | 0.1 ± 1.3  | 222.1 ± 32.9 |
| S4  | 2021/5/13 19:15 | 1005.8 ± 0.0 | 65.0 ± 1.4 | -             | 30.4 ± 0.1 | 5.5 ± 2.1  | 95.9 ± 67.1  |
| S5  | 2021/5/14 10:50 | 1006.9 ± 0.0 | 75.4 ± 0.5 | 932.7 ± 4.1   | 30.9 ± 0.1 | 2.4 ± 0.7  | 193.3 ± 38.7 |
| S6  | 2021/5/16 21:50 | 1008.3 ± 0.1 | 77.3 ± 0.8 | -             | 29.8 ± 0.1 | 3.7 ± 0.5  | 68.3 ± 48.3  |
| S7  | 2021/5/18 21:12 | 1008.0 ± 0.0 | 77.0 ± 0.0 | -             | 30.5 ± 0.0 | 0.5 ± 0.4  | 128.1 ± 51.4 |
| S8  | 2021/5/19 8:42  | 1008.2 ± 0.0 | 74.8 ± 0.6 | 661.4 ± 6.3   | 31.0 ± 0.1 | 2.1 ± 0.6  | 123.0 ± 32.5 |
| S9  | 2021/5/20 18:00 | 1007.7 ± 0.1 | 68.5 ± 0.5 | 54.4 ± 8.6    | 31.6 ± 0.1 | 0.3 ± 0.3  | 109.5 ± 40.4 |
| S10 | 2021/5/22 8:40  | 1008.0 ± 0.1 | 73.8 ± 0.6 | 278.1 ± 136.2 | 30.2 ± 0.1 | 1.3 ± 0.3  | 43.1 ± 66.1  |
| S11 | 2021/5/23 8:39  | 1007.6 ± 0.1 | 74.9 ± 0.7 | 646.7 ± 9.9   | 30.1 ± 0.1 | 3.2 ± 0.6  | 83.0 ± 61.8  |
| S12 | 2021/5/23 20:43 | 1008.6 ± 0.0 | 80.4 ± 0.7 | -             | 29.1 ± 0.1 | 3.6 ± 0.6  | 91.5 ± 69.4  |
| S13 | 2021/5/24 8:01  | 1009.3 ± 0.0 | 74.9 ± 0.3 | 526.1 ± 10.5  | 30.3 ± 0.1 | 2.5 ± 0.5  | 133.4 ± 43.6 |
| S14 | 2021/5/24 16:03 | 1007.1 ± 0.0 | 75.7 ± 0.8 | 94.5 ± 4.9    | 30.4 ± 0.1 | 2.4 ± 0.7  | 76.9 ± 48.1  |
| S15 | 2021/5/25 9:21  | 1010.1 ± 0.0 | 77.6 ± 0.5 | 734.1 ± 86.0  | 29.8 ± 0.1 | 4.7 ± 0.5  | 317.3 ± 47.0 |
| S16 | 2021/5/30 22:11 | 1002.9 ± 0.1 | 96.0 ± 0.0 | -             | 27.3 ± 0.0 | 2.0 ± 0.3  | 108.9 ± 68.7 |
| S17 | 2021/6/2 9:10   | 1007.2 ± 0.0 | 78.5 ± 0.5 | 675.9 ± 17.1  | 29.8 ± 0.1 | 3.1 ± 0.4  | 17.6 ± 42.1  |
| S18 | 2021/6/5 18:23  | 1003.0 ± 0.1 | 83.8 ± 0.4 | 2.3 ± 0.5     | 29.0 ± 0.1 | 11.8 ± 0.9 | 279.0 ± 36.0 |
| S19 | 2021/6/7 8:45   | 1006.7 ± 0.1 | 86.3 ± 0.9 | 110.9 ± 36.6  | 27.8 ± 0.1 | 4.1 ± 3.2  | 105.5 ± 45.3 |

85 \* The relative wind direction and wind speed are 10-min vector average.

86

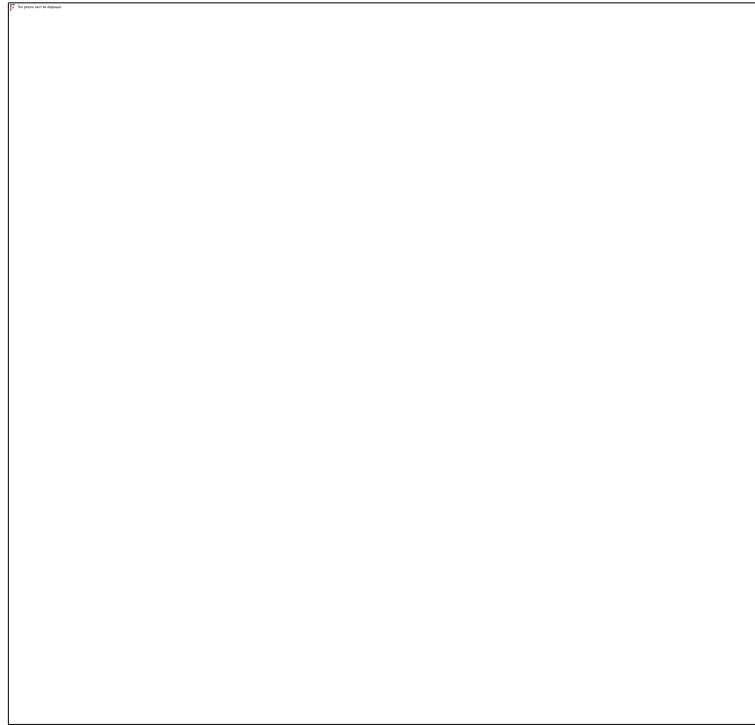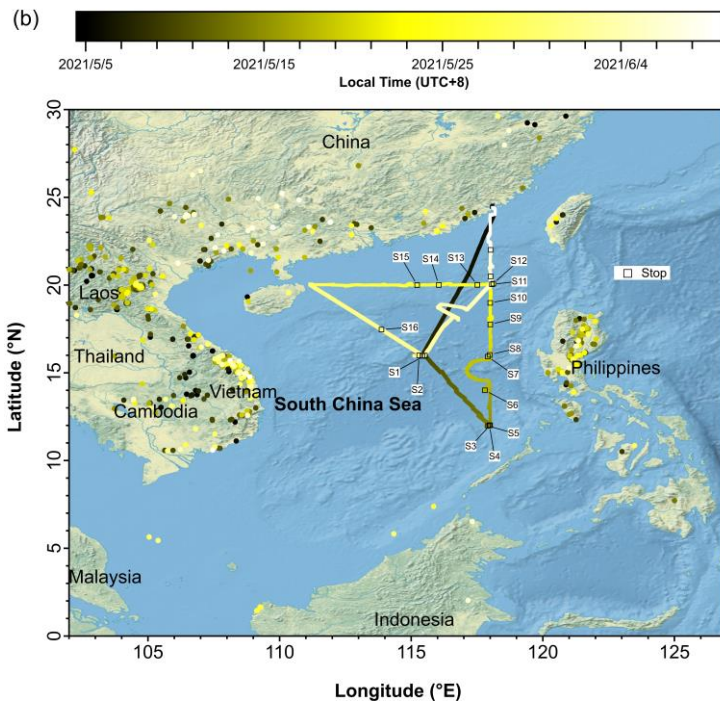

87

88 **Figure S3.** Map of the ship route in the South China Sea during the campaign. The open  
89 triangles in (a) and squares in (b) indicate the single particle sampling location, collected  
90 during navigation and stop. The samples marked in N1 to N15 for navigation sampling and S1  
91 to S19 for stop sampling in serial. The solid circles indicate the fire spots with a confidence  
92 level greater than 80% using MODIS satellite data.

93 4. AAE calculation

94 The long-range biomass burning transport affects the air mass in the South China Sea (SCS).  
95 Two methods were used to obtain the hourly absorption Ångström exponent (AAE) values  
96 from the AE33 measurements. Figure S4a shows an example of the AAE calculation for a ship  
97 plume at 18:00 on May 5. Figure S4b demonstrates the linear relationship between the AAE  
98 values obtained from all wavelengths and those obtained from a pair of wavelengths at 470  
99 and 950 nm. The fitting results indicate that AAE (all wavelengths) was lower than AAE (470,  
100 950 nm) with a fitting slope of 0.78 and a determination coefficient ( $R^2$ ) of 0.98.

101

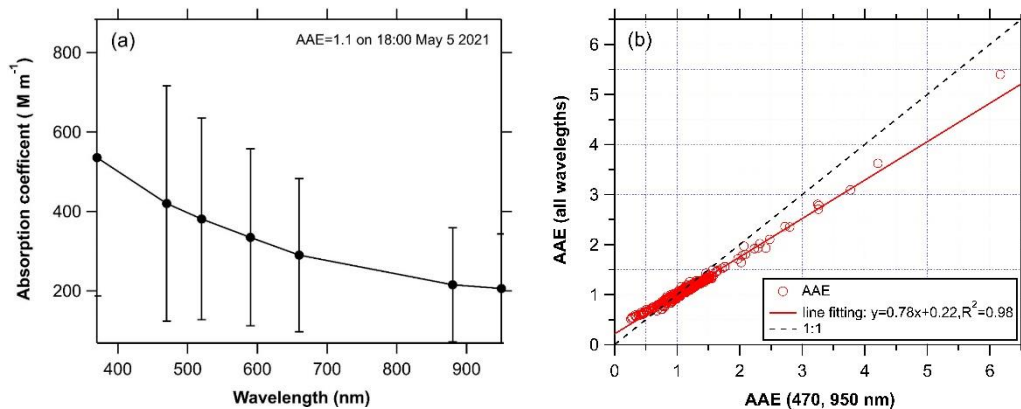

102

103 **Figure S4.** (a) A ship plume at 18:00 on May 05 for the wavelength-dependent absorption  
104 Ångström exponent (AAE) based on the hourly averaged data, (b) AAE obtained from all the  
105 wavelengths vs the AAE obtained from two wavelengths at 470 and 950 nm based on hourly  
106 averaged data during the campaign.

107 **5. Typhoon 202103 (CHOI-WAN)**

108 Typhoon 202103 (CHOI-WAN) was born on 18:00 UTC, May 30, 2021, and dead on 6:00 UTC,  
109 June 5, 2021. We met this typhoon during our cruise measurement. Figure S5 shows the best  
110 track of the map and central pressure chart. Basic information is available online  
111 (<http://agora.ex.nii.ac.jp/digital-typhoon/summary/wnp/s/202103.html.en>).

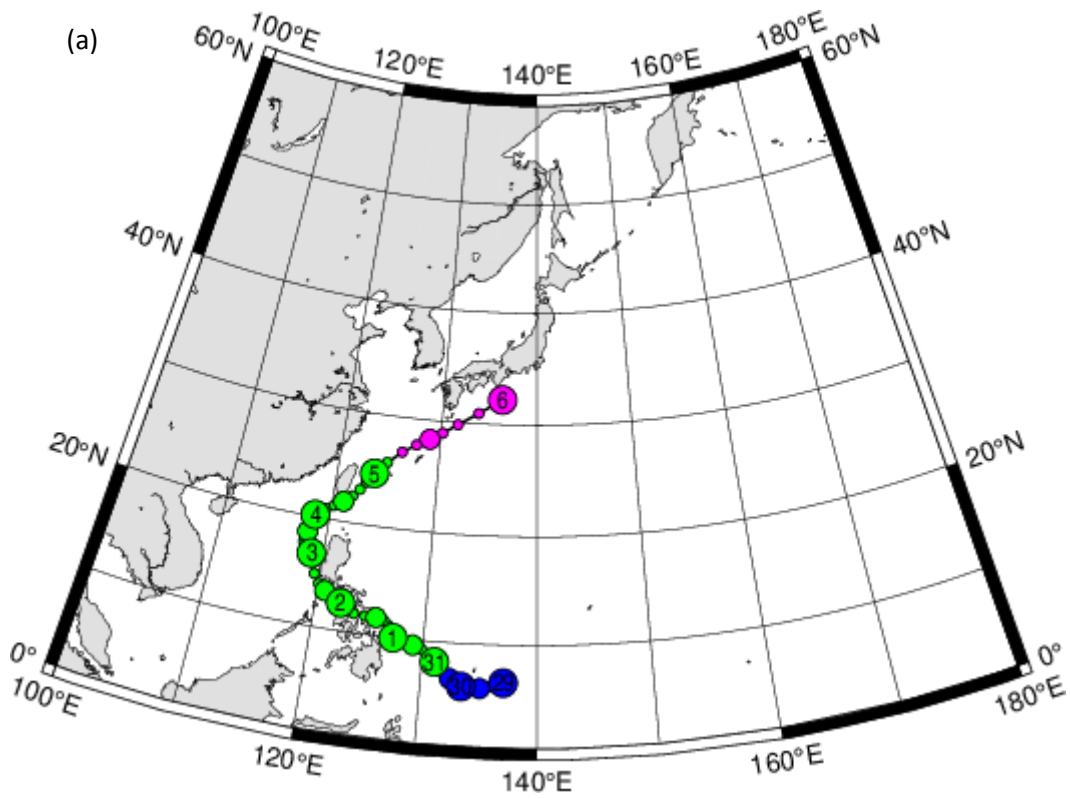

112

113

(b)

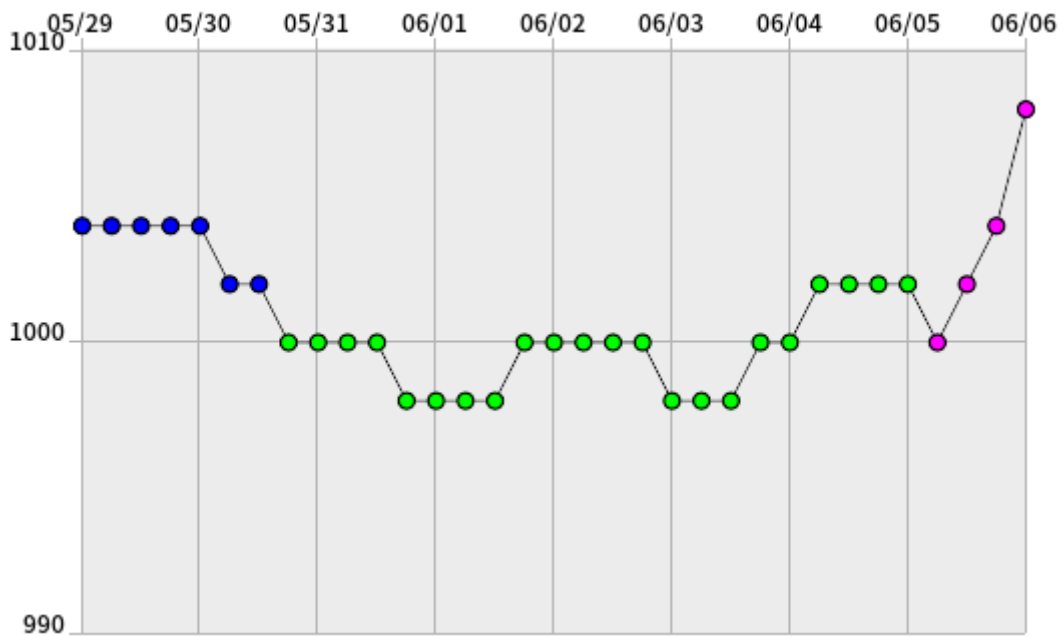

114

115 **Figure S5.** (a) Best track map of the typhoon 202103 (CHOI-WAN), and (b) the central  
 116 pressure chart (time zone=UTC, Local time=UTC+8).

117

118 **6. Multi-peak fitting of single particles**



119 We didn't successfully obtain a bimodal or multi-peak fit for data of the stop cases using the  
120 multi-peak fitting function in Igor Pro software, as shown in Figure S15-6.

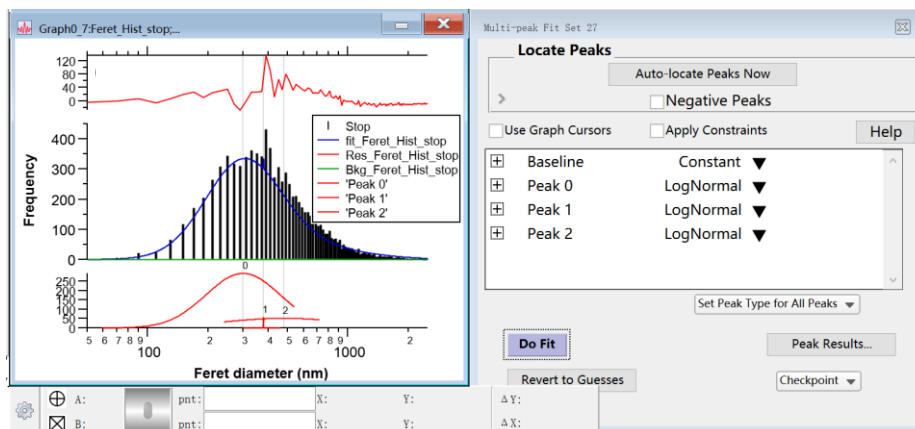

122 **Figure S6.** Multi-peak fit particle size distribution using Ferret diameter determined with Igor  
123 Pro software during stop (b).

124

## 125 7. TEM images and EDS spectrum of the BC particles and the tar balls

126 Figure S7 shows the TEM images of the three Navigation samples before and after beam  
127 focus, revealing the presence of external and internal BC particles. Figure S8 presents the  
128 representative single particles and their corresponding EDS spectra for the navigation  
129 samples, indicating that the major components are: (a, c) BC and sulfate, (b) sulfate, (d) sea  
130 salt, organics and BC. Notably, detecting nitrogen (N) element in EDS is challenging due to its  
131 high vaporization rate, whereas potassium (K) serves as a tracer for biomass-burning in the  
132 BC- and sulfate-containing particles.

133 The stop samples, shown in Figure S9, exhibit both internal mixtures and externally large  
134 aggregates of the BC particles. The EDS point analysis of freshly emitted BC particles in Figure  
135 S9c reveals the presence of very thin coating elements. In summary, the stop single particles  
136 were influenced by both the own ship emissions and long-range transport air masses.

137 Figure S10 depicts example images of tar balls mixed with black carbon in the geometrical  
138 size range of 159–190 nm from the single particles collected during stop on May 14 and 23,  
139 2021. The backward trajectories suggest that the air masses were originated from the  
140 Philippines, possibly due to biomass burning during those days. Figure S11 shows example  
141 images of pure BC particles, consisting of nano-soot particles with a diameter of 40–50 nm.  
142 Obviously, the size of tar balls is significantly larger than that of nano-soot spheres.

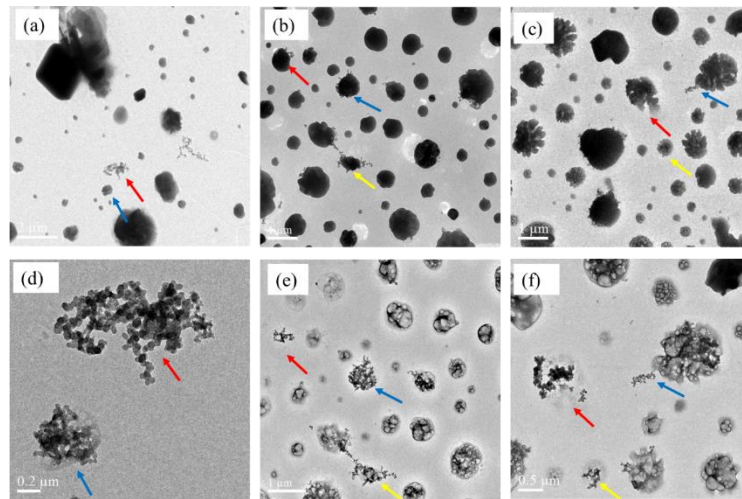

143

144 **Figure S7.** The example TEM images before (a, b, and c) and after (d, e and f) electron beam  
 145 focus for the single particles collected during navigation. The same color arrows in each pair  
 146 of images (a and d, b and e, c and f) indicate the same single particles.

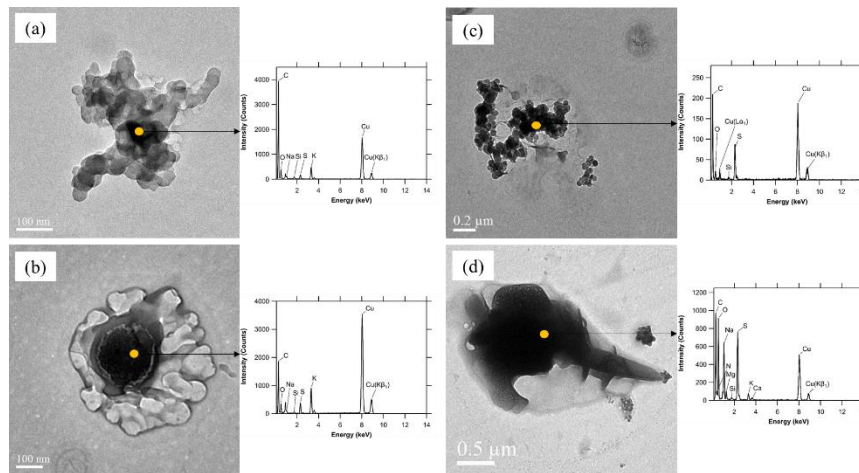

147

148 **Figure S8.** Examples of the EDS spectra for the single particles from the navigation samples.  
 149 Si and Cu are excluded from the particle composition. (a) BC, and thin sulfate coating  
 150 ( $\text{Na}_2\text{SO}_4$ ,  $\text{K}_2\text{SO}_4$ ), (b) sulfate ( $\text{Na}_2\text{SO}_4$ ,  $\text{K}_2\text{SO}_4$ ), (c) BC, and thick sulfate coating, and (d) BC, sea  
 151 salt. The orange spots indicate the point analysis of EDS spectra. The right spectrum  
 152 corresponds to each left particle. The Y-axis is the intensity (counts) and X-axis is the energy  
 153 (KeV).

154

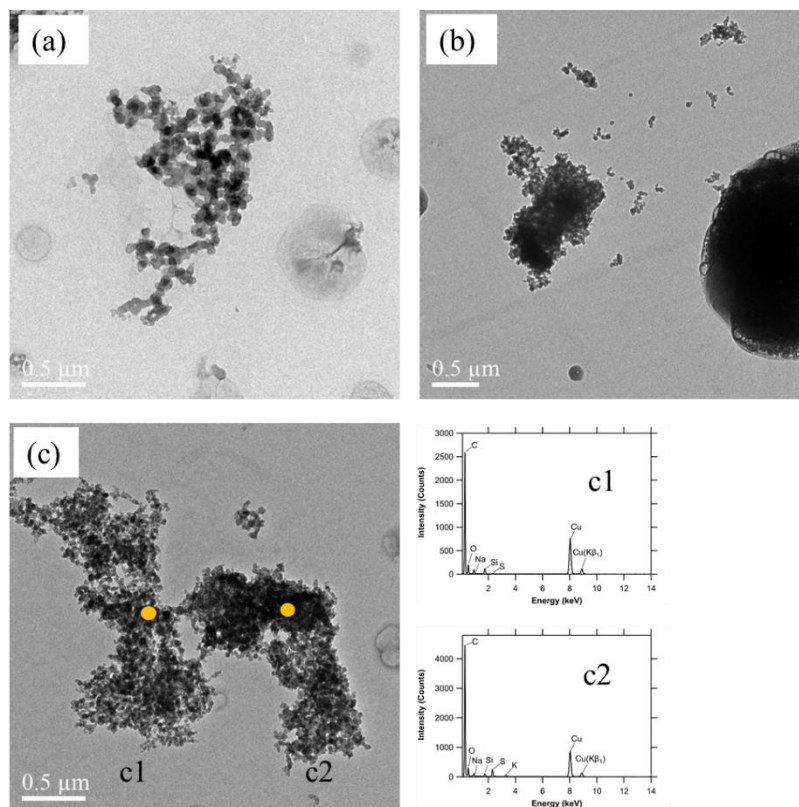

155

156 **Figure S9.** The example TEM images (a, b, c) of BC particles collected during stop. The orange  
 157 spots indicated the point analysis of the EDS spectra (the left part c1 and the right part c2)  
 158 are for the image c.

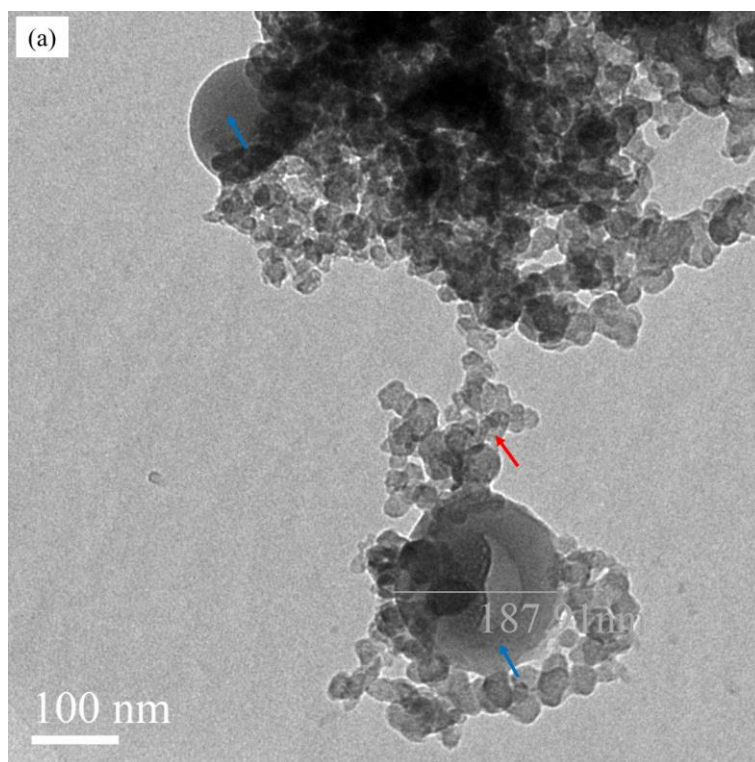

159

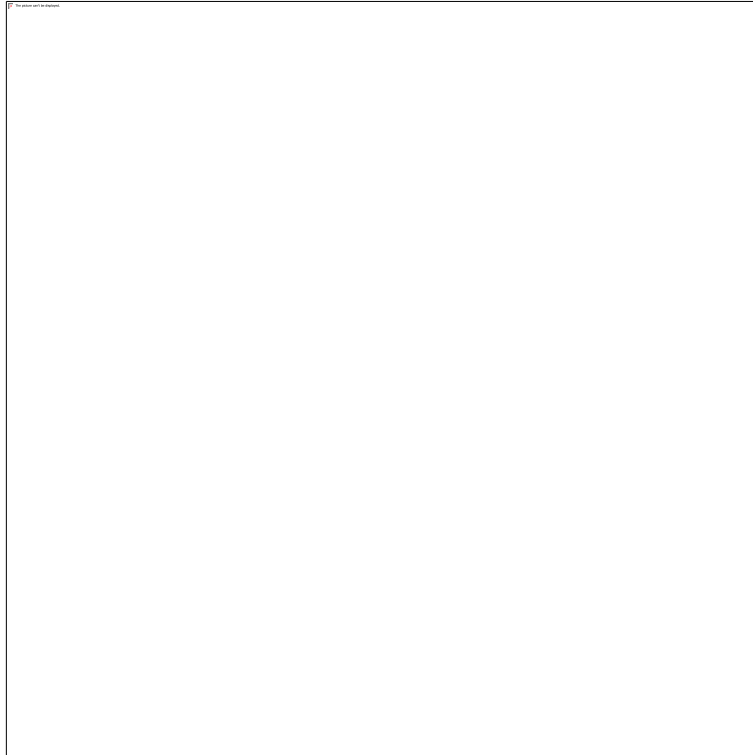

160

161 **Figure S10.** Example images of tar ball-containing particles collected during stop: (a) tar balls  
162 (170–190 nm) mixed with black carbon (BC) and sea salt on 10:50 May 14 2021; (b) tar balls  
163 consisting of 159 nm spherical particles on 8:39 May 23, 2021. The red arrows indicated BC  
164 particles and the blue arrows indicated tar balls.

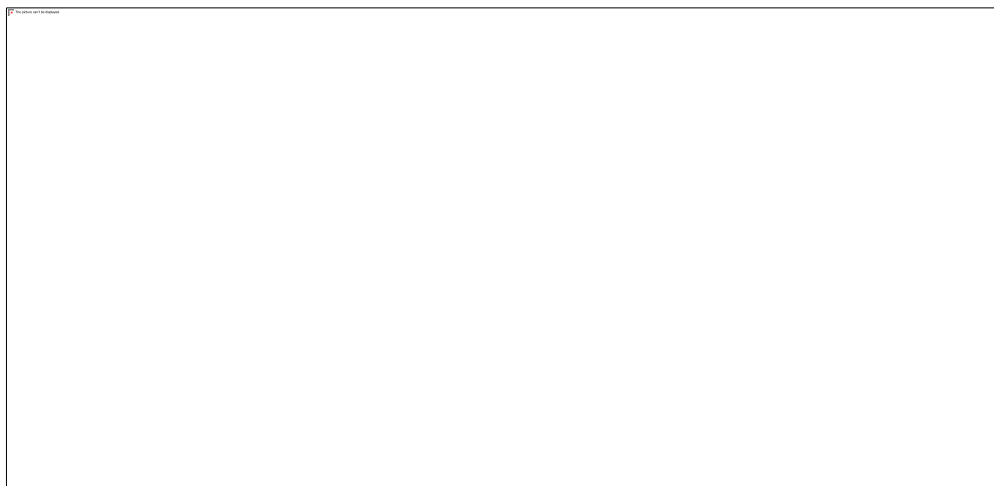

165

166 **Figure S11.** Images of (a) aggregated BC particles, (b) BC made of small 40–50 nm nano-soot  
167 spheres. The S11(b) image is a magnification of the part in the red rectangle in panel a.

168 8. The diurnal average variation of OC, EC

169 Figure S12(a, b) shows the linear relationship between the Magee AE33 derived BC at 880  
170 nm and the Sunset derived optical EC at 660 nm, with a time resolution of 1 min and 1h,

171 respectively. The limit of detection (LOD) for optical EC, as determined by the Sunset OC/EC  
172 analyzer, is  $0.062 \mu\text{g C m}^{-3}$ , based on the blank filter analysis of three times the standard  
173 deviation ( $3\sigma$ ). The fitted correlation between the two variables in Figure S12a has a slope  
174 and intercept of the 0.97 and 0.44, respectively, with a determination coefficient ( $R^2$ ) of 0.68.  
175 However, the linear correlation between the AE33 derived BC and the Sunset EC at a time  
176 resolution of 1 h has a slope and intercept of 1.66 and -0.01, respectively, with a higher  $R^2$  of  
177 0.91 (Figure S12b). In addition, Figure S12c displays the correlation between the optical EC  
178 and thermal EC data measured by the Sunset instrument. The slope and intercept of the  
179 fitted line are 1.55 and -0.21, respectively, with  $R^2=0.97$ . The differences of the two  
180 instruments are mainly attributed to the technical principles of the methods used for the  
181 data processing. Similar results have been reported in other studies (Brown et al., 2019).

182

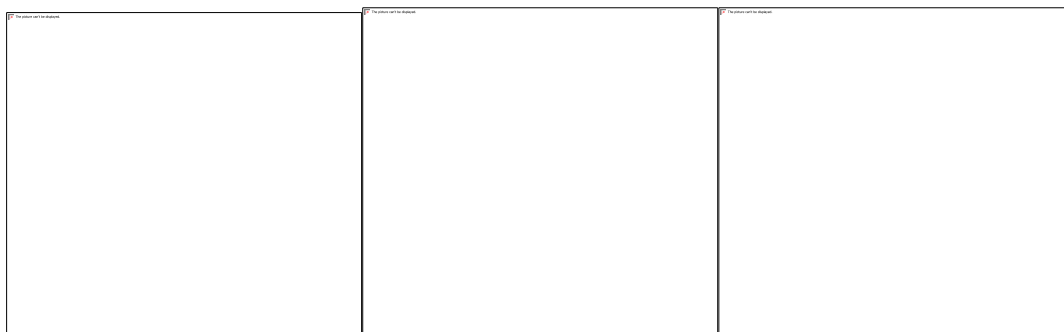

183

184 **Figure S12.** The linear relationship between the AE33 derived BC and the Sunset derived  
185 optical EC with 1-min time resolution (a), thermal EC with 1-h time resolution (b), and Sunset  
186 derived optical EC vs thermal EC with 1-h time resolution (c) for all the data during the  
187 campaign in the SCS.

#### 188 9. Possible biological particles collected during the campaign

189 Two examples of possible biological particles were collected on two different days. Figure  
190 S13a displays brocosomes, which are known to be produced by leaf-hopping insects. This  
191 finding is supported by a previous study (Fu et al., 2012). Figure S13b depicts a rod-like  
192 particle that has yet to be identified.

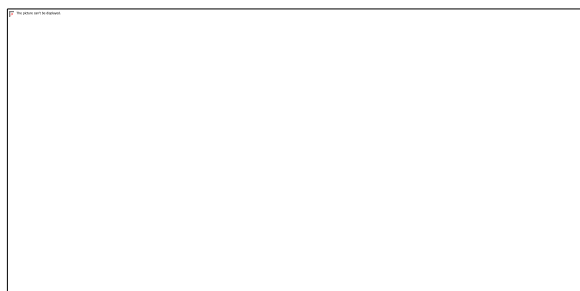

193

194 **Figure S13.** (a) Flower-like biological particles collected at 10:50 on May 14, (b) Rod-like  
195 biological particles collected at 8:01 on May 24.

#### 196 10. CALIPSO observation

197 Cloud-Aerosol Lidar & Infrared Satellite Observation (CALIPSO) is a remote sensor on board  
198 the TERRA and AQUA satellites. CALIPSO observation can provide vertical and horizontal  
199 distribution of the cloud and aerosol layers using the elastic backscatter intensities  
200 (extinction-to-backscatter ratio) at an Nd:YAG laser wavelength of 532 and 1064 nm near the  
201 nadir of the orbit track. CALIPSO L1 Standard V4.20 products are available from the NASA  
202 Langley Research Center ([https://www-calipso.larc.nasa.gov/tools/data\\_avail/](https://www-calipso.larc.nasa.gov/tools/data_avail/)). Images of  
203 vertical feature mask (VFM) and aerosol subtype (AS) were used to show the vertical and  
204 horizontal properties of clouds, aerosol layer and identification (Liu et al., 2019; Omar et al.,  
205 2009). Convective transport is important to the vertical distribution of aerosols (Niu et al.,  
206 2019).

207 Figures S14 and S15 show the orbit track location, vertical feature mask, and aerosol  
208 subtype at 6:00 on May 15, and 19:30 on June 07, respectively. These images show that  
209 polluted continental/smoke and elevated smoke exist in the aerosol layer with an altitude of  
210 1–3 km over the SCS regions and Southeast Asia.

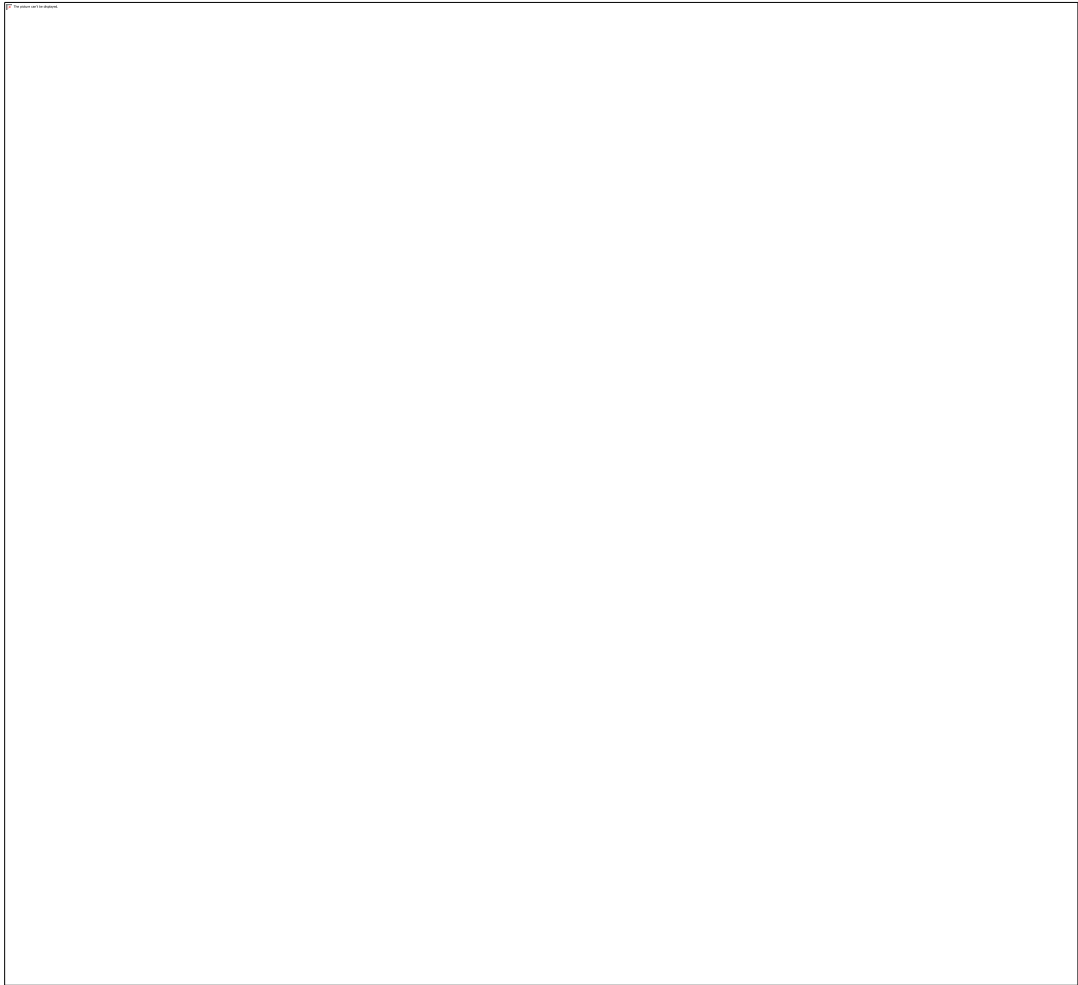

211

212 **Figure S14.** (a) Orbit track location indicated by blue curve, (b) vertical feature mask, and (c)  
213 aerosol subtype at UTC 6:00 on May 15, a time before the summer monsoon started in the  
214 SCS.

215

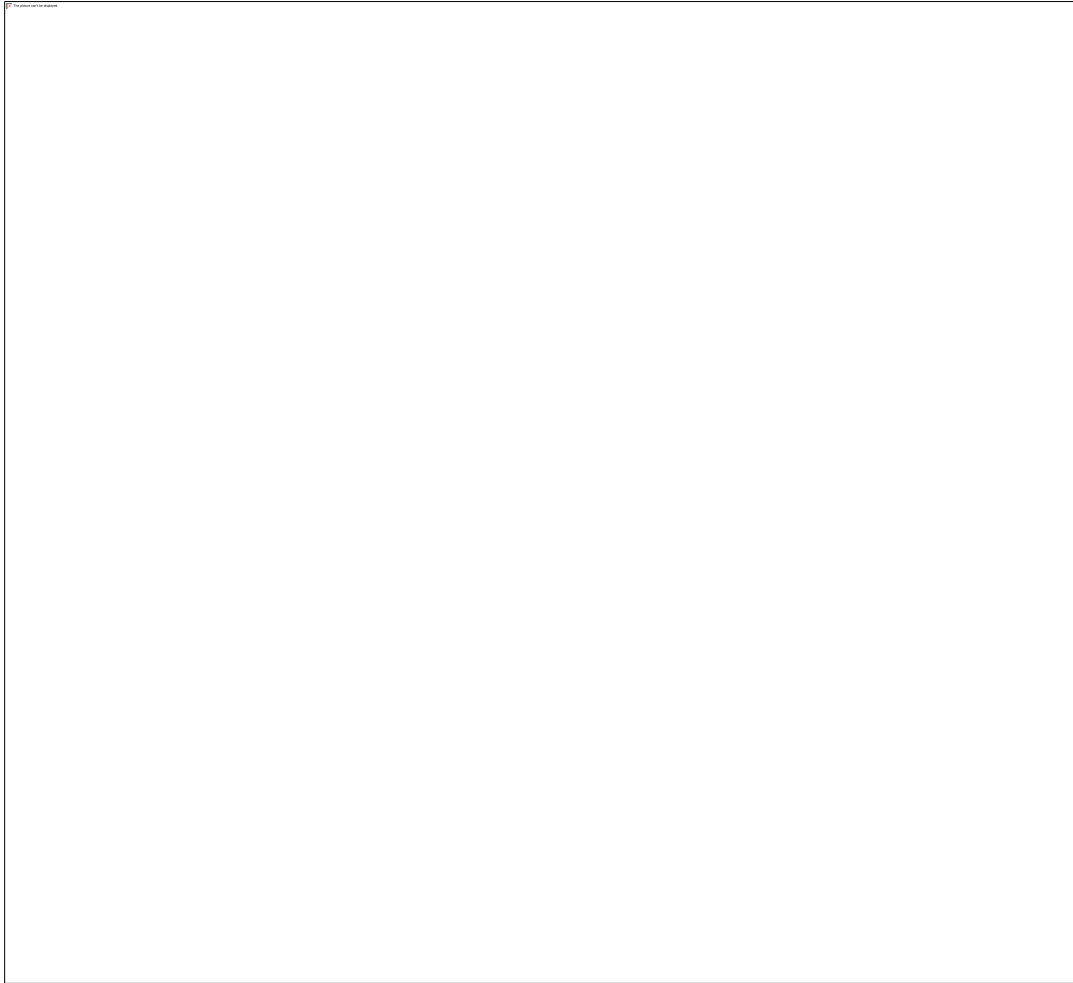

216

217 **Figure S15.** (a) Orbit track location indicated by blue curve, (b) vertical feature mask, and (c)  
218 aerosol subtype at UTC 19:30 on June 07, a time after summer monsoon passed in the SCS.

219

## 220 **11. Time resolution and accuracy for the automatic weather station**

221 The time resolutions for the original meteorological and GPS data are 3 seconds. The  
222 position accuracies for the X and Y axes are 1 cm +1 ppm RMS (root mean square), and for Z  
223 axis is 2 cm +1 ppm RMS. The accuracy of wind speed and wind direction is  $\pm 0.2 \text{ m s}^{-1}$  (or  
224 3% of reading) and  $\pm 2^\circ$ , respectively. The accuracy of temperature with RS-485 output at +20  
225 to +60 °C is  $\pm (0.07 + 0.0025 \times \text{temperature})$  °C. The accuracy of relative humidity at -20 to +  
226 40 °C is  $\pm (1 + 0.008 \times \text{reading})$  %RH. The accuracy of pressure with factory calibration is  $\pm$   
227 0.15 hPa (Class A).

228

## 229 **12. Additional BC fractal analysis**



230 A combination of BC particles in this study collected in the South China Sea and previous BC  
231 particles collected on an island in the East China Sea (Sun et al, 2020) is shown in Figure S16.

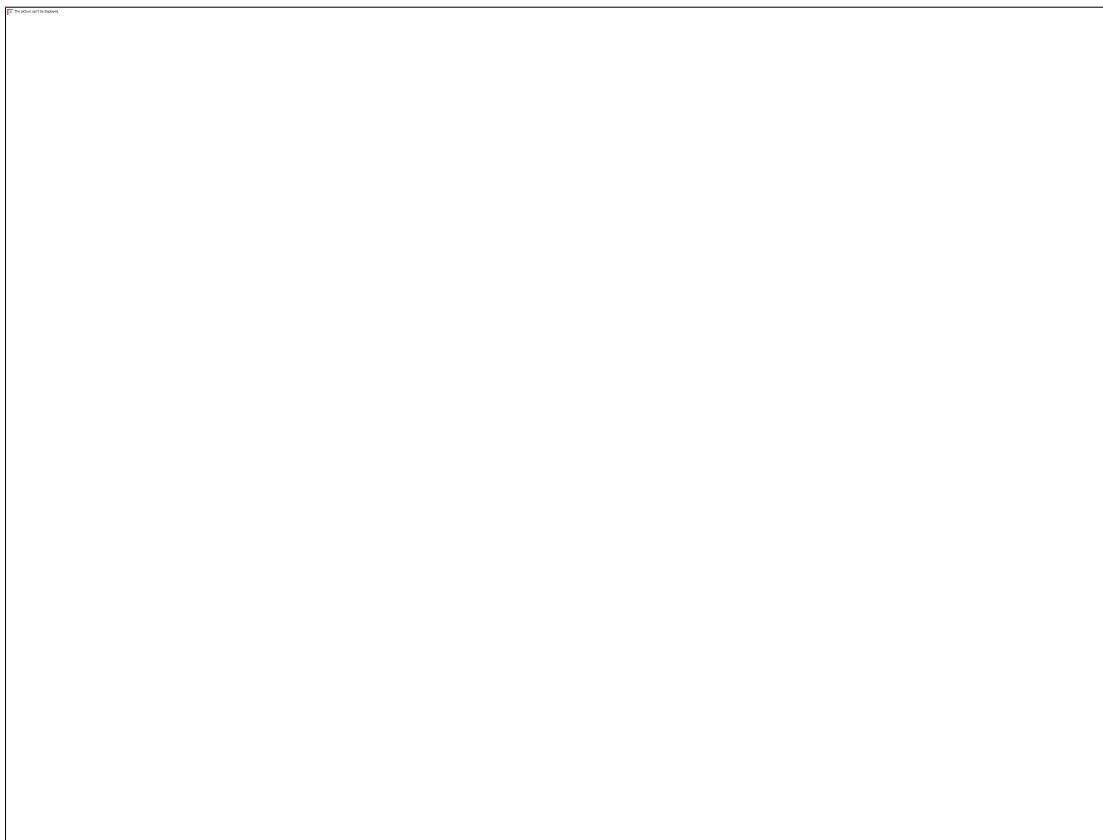

232

233 **Figure S16.** The size-dependent fractal dimension ( $D_f$ ) and lacunarity ( $L$ ) for each BC particle during navigation  
234 and stop. A total number of 240 data points are shown in Figure S16. LRT and indicated particles from long-range  
235 transport and local pollution, respectively.

## 236 References

- 237 Brown, S., Minor, H., O'Brien, T., Hameed, Y., Feenstra, B., Kuebler, D., Wetherell, W., Day,  
238 R., Tun, R., Landis, E., and Rice, J.: Review of Sunset OC/EC instrument measurements  
239 during the EPA's Sunset carbon evaluation project, *Atmosphere (Basel)*, 10, 287,  
240 <https://doi.org/10.3390/atmos10050287>, 2019.
- 241 Fu, H., Zhang, M., Li, W., Chen, J., Wang, L., Quan, X., and Wang, W.: Morphology,  
242 composition and mixing state of individual carbonaceous aerosol in urban Shanghai,  
243 *Atmos. Chem. Phys.*, 12, 693–707, <https://doi.org/10.5194/acp-12-693-2012>, 2012.
- 244 Liu, Y., Zhu, Q., Wang, R., Xiao, K., and Cha, P.: Distribution, source and transport of the  
245 aerosols over Central Asia, *Atmos. Environ.*, 210, 120–131,  
246 <https://doi.org/10.1016/j.atmosenv.2019.04.052>, 2019.
- 247 Marple, V. A. and Olson, B. A.: Sampling and measurement using inertial, gravitational,  
248 centrifugal, and thermal techniques, in: *Aerosol measurement: Principles, techniques, and*

- 249 applications, edited by: Kulkarni, P., Baron, P. A., and Willeke, K., John Wiley and Sons,  
250 Hoboken, New Jersey, USA, 129–151, <https://doi.org/10.1002/9781118001684.ch8>, 2011.
- 251 Niu, H., Kang, S., Gao, W., Wang, Y., and Paudyal, R.: Vertical distribution of the Asian  
252 tropopause aerosols detected by CALIPSO, *Environ. Pollut.*, 253, 207–220,  
253 <https://doi.org/10.1016/j.envpol.2019.06.111>, 2019.
- 254 Omar, A. H., Winker, D. M., Vaughan, M. A., Hu, Y., Trepte, C. R., Ferrare, R. A., Lee, K.-P.,  
255 Hostetler, C. A., Kittaka, C., Rogers, R. R., Kuehn, R. E., and Liu, Z.: The CALIPSO  
256 automated aerosol classification and Lidar ratio selection algorithm, *J. Atmos. Ocean.  
257 Technol.*, 26, 1994–2014, <https://doi.org/10.1175/2009jtecha1231.1>, 2009.
- 258 Sorensen, C. M. and Roberts, G. C.: The Prefactor of Fractal Aggregates, *J. Colloid. Interf.  
259 Sci.*, 186, 447–452, <https://doi.org/10.1006/jcis.1996.4664>, 1997.
- 260 Sun, C., Adachi, K., Misawa, K., Cheung, H. C., Chou, C. C. K., and Takegawa, N.: Mixing  
261 state of black carbon particles in Asian outflow observed at a remote site in Taiwan in the  
262 spring of 2017, *J. Geophys. Res. Atmos.*, 125, 13, <https://doi.org/10.1029/2020jd032526>,  
263 2020.
- 264 Zhang, K., Allen, G., Yang, B., Chen, G., Gu, J., Schwab, J. J., Felton, D., and Rattigan, O.:  
265 Joint measurements of PM<sub>2.5</sub> and light-absorptive PM in woodsmoke-dominated ambient  
266 and plume environments, *Atmos. Chem. Phys.*, 17, 11441–11452,  
267 <https://doi.org/10.5194/acp-17-11441-2017>, 2017.
- 268
