# Supplementary material for: Morphological and optical properties of carbonaceous aerosol particles from ship emissions and biomass burning during a summer cruise measurement in the South China Sea
Source: Copernicus journal article supplement (doi:10.5194/egusphere-2023-1589), 2023-07-31
Supplement: Supplementary file [file egusphere-2023-1589-AC1-supplement.pdf]

1 **Response to Reviewer 1**

2 Comments:

3 The manuscript *Morphological and optical properties of carbonaceous aerosol*  
4 *particles from ship emissions and biomass burning during a summer cruise*  
5 *measurement in the South China Sea* investigated the morphological and absorption  
6 properties of BC particles in South China Sea and found that the size and mixing state  
7 of BC particles and tar balls differs during ship navigation and stop period, indicate the  
8 different aging degrees. Meanwhile, this study revealed biomass burning and fossil fuel  
9 combustion contributed respectively to 18–22% and 78–82% of all the BC light  
10 absorption, showed that biomass burning was predominantly from the Philippines and  
11 Southeast Asia before and after the summer monsoon during the cruise campaign.  
12 Generally, the study is interesting and meaningful. The study still needs some  
13 improvements. The manuscript needs some revision in order to be published:

14 We thank the reviewer for valuable comments and suggestions. We have revised the  
15 manuscript accordingly. All revised points are indicated in red in the manuscript. The  
16 point-by-point responses are given below. Note that we have rearranged the Results and  
17 Discussion section per the reviewer #2's suggestion.

181. What's the difference between Feret diameters and geometrical diameters?

19 Feret diameter and geometrical diameter are different. Feret diameter or Feret's  
20 diameter, is a measure of a particle size along a specific direction. We have revised the  
21 main text in lines 194-197, "In the analysis of particle size, the Feret diameter is defined  
22 as the distance between the parallel tangential lines that constrain the particle  
23 perpendicularly. In this study, we applied the Feret diameter as the longest distance  
24 between any two points along the boundary of the selected particles."

25 The term "geometrical diameter" signifies the distance between two points located on  
26 the surface of a geometric shape, with this line passing through the center of the shape.  
27 In this study, we utilized this concept in the analysis of transmission electron  
28 microscopy (TEM) images to quantify the size of tar balls with circular shapes.  
29 Specifically, we employed TEM data acquisition software to measure the geometrical  
30 diameters of the tar balls.

31 Why you use the former one to describe BC particles and use the latter to describe tar  
32 balls?

33 The Feret diameter is utilized to describe BC particles in this study because it allows  
34 for efficient particle counting capabilities before and after coating vaporization under  
35 electron beams using the ImageJ software.

36 The reason for using geometrical diameter is that bare tar balls are not found within the  
37 analyzed samples. Instead, tar balls mixed with other components (e.g., sea salt, organic  
38 matter, BC, and sulfate) were observed. Therefore, it is appropriate to quantify the size  
39 of the observed tar balls which excluded any coatings or additional materials using  
40 geometrical diameter.

41 We have revised the main text in lines 197-201, “Moreover, we utilized geometrical  
42 diameter to describe the size of tar balls with circular shape, which signifies the distance  
43 between two points located on the surface of a geometric shape, with this line passing  
44 through the center of the shape. The usage of geometrical diameter is reasonable for  
45 measuring the size of the observed tar balls which excluded any coatings or additional  
46 materials. Specifically, we employed TEM data acquisition software to measure the  
47 geometrical diameters of the observed tar balls.”

48 The *Abstract* part is too long, maybe it will be better just listing the most important  
49 results in abstract.

50 The abstract has been revised according to the reviewer’s suggestion. Specifically, the  
51 methodology section was condensed through the revision of lines 21-22, 26-27, 30 and  
52 the removal of the following sentences:

53 “Single particle samples were classified into two modes: “stop” when the ship was  
54 anchored and “navigation” when the ship sailed at high speed.”

55 “The median OC/EC ratios were 8.14, 5.20, 6.35, and 2.63 during BMP, TMP, AMP,  
56 and SPP, respectively, showing higher OC/EC ratios for biomass burning emissions  
57 than for fossil fuel emissions. Additionally,”

58 “This study provides information about the morphology and the optical properties of  
59 carbonaceous aerosols which can be used to evaluate their effects on light absorption  
60 and hence the climatic radiative forcing in the SCS region.”

612. In line 54, what’s the meaning of onion-like graphite layer microstructures? From the  
62 TEM image, the BC particles don't look much like onions.

63 The term “onion-like” was originally used to describe the microstructure of nano-soot  
64 particles. To avoid the ambiguity, it has been revised to "graphene-like layers" and a  
65 reference has also been cited (Adachi et al., 2019) in line 48.

663. As for Figure 6, why just chose some BC particles not all BC particles? Since not all  
67 BC particles are included in the discussion, the conclusion that small-sized BCs are  
68 more easily encapsulated is not very convincing (In line 295).

69 We should point out that the particles in Figure 6 include pure BC and BC without thick  
70 coatings. We chose specific BC particles instead of all BC particles for two primary  
71 reasons: (1) A comprehensive investigation of all BC particles (BC-containing particles)  
72 has recently been addressed by others (Pang et al., 2022). In their paper, all BC particles  
73 were discussed, including fresh soot, partly coated soot and embedded soot particles. It  
74 was found that the number fraction of embedded soot particles at the rural sites was  
75 higher, and these particles had the highest fractal dimension ( $D_f$ ), implying that aged  
76 BC particles became more compact after long-range transport. However, the  
77 characteristics of bare BC or pure BC exposed to other composition have not been  
78 comprehensively investigated. We hence focus on the pure or bare BC particles to  
79 explore their roles during aging in this study. (2) We convey that most aged BC particles  
80 were small after long-range transport, regardless they were initially small or became  
81 smaller due to the collapse of large BC aggregates. We have now revised the main text  
82 in lines 371-374, “Most BC particles were below 1  $\mu\text{m}$  in Feret diameter during  
83 navigation (Figure 7), while their sizes cover a wide range below 3  $\mu\text{m}$  during stop,  
84 implying that the aged BC particles become smaller after long-range transport. Despite  
85 only a total of 134 BC data points shown in Figure 7, the results are still statistically  
86 meaningful due to the wide range of BC sizes covered in our analysis. Note that the size  
87 change of a BC particle cannot be determined because the original size of the particle  
88 is unknown before the removal of the coatings.”

89 In line 285, *among which were emitted from the own ship (e, f)*: Why only mention e/f,  
90 isn't d also from own ship's emissions?

91 The emissions from the own ship (research vessel) are much easily distinguished from  
92 other ships. For example, the BC particles (e, f in Figure 6) are emitted directly from  
93 the research vessel, showing the presence of large BC aggregates in the freshly emitted  
94 BC particles. In contrast, aged BC particles (d in Figure 6) were thickly coated, which  
95 may originate from long-range transport of emissions from distant ships. We have now  
96 revised the relevant description in lines 354-359, “Comparatively, a mixture of aged  
97 BC particles and much larger fresh BC particles as well as smaller scattered BC  
98 particles during stop were found (Fig. 6d-f), which were likely emitted from other ships

99 (Fig. 6d) and the research vessel (e, f). These TEM images showed that the compressed  
100 BC particles are typically more aged and atmospherically processed, while the fractal  
101 BC particles are fresh. Moreover, EDS analysis showed that sulfate formed from  
102 aqueous processes and less viscous organic coating indicate an aging process. Those  
103 BC particles with Feret diameters larger than 2  $\mu\text{m}$  during stop were fractal agglomerates  
104 which could unlikely survive due to deposition during long-range transport.”

1054. In line 300, since Tar balls were frequently observed during the campaign, then what’s  
106 the number fraction of tar balls in all particles?

107 We estimated the fraction of tar balls to be approximately 11.8% through the number of  
108 observed samples containing tar balls divided by the total number of analyzed samples,  
109 including both Navigation and Stop samples. We have now included this information  
110 in the main text in line 377, “Tar balls were frequently observed during the campaign  
111 with an estimated fraction of 11.8%.”

1125. There are mismatches between the appendix images and the image numbers mentioned  
113 in the main text: (1) Fig S5 is Map of the ship route, but line 287 says Fig S5  
114 demonstrate "heavily coated internal BC particles were found during stop"; Fig S6 is  
115 titled "particles taken during navigation", but line 306 says Fig S6 contains tar ball mix  
116 with BC taken during stop. There are many more descriptions that don't match up.

117 We have thoroughly double checked and corrected all the mismatches/discrepancies  
118 both in the main text and the Supplementary Information (SI).

1196. In line 335, *EC concentrations during SPP, ranging from 0.15 to 22.8  $\mu\text{g m}^{-3}$* , But the  
120 EC concentration range for SPP in Fig 9 is around 1.7, why is that?

121 The EC concentrations ranged from 0.15 to 22.8  $\mu\text{g m}^{-3}$  with a median concentration of  
122 1.7  $\mu\text{g m}^{-3}$  during SPP (Figure 9). We have revised Figure 9 and added more discussion  
123 in lines 399-402, “Compared with Figure 9d, the higher and more scattered OC/EC  
124 ratios in Figure 9a, b, c are caused by the very low EC concentrations. The presence of  
125 extremely low EC concentrations, often falling below or close to the detection limit,  
126 can introduce discrepancies in the calculation of the OC/EC split, ultimately resulting  
127 in inaccurate EC concentrations (Bauer et al., 2009).”

## 128 **References**

129 Adachi, K., Sedlacek, A. J., III, Kleinman, L., Springston, S. R., Wang, J., Chand, D.,  
130 Hubbe, J. M., Shilling, J. E., Onasch, T. B., Kinase, T., Sakata, K., Takahashi, Y.,  
131 and Buseck, P. R.: Spherical tarball particles form through rapid chemical and

132 physical changes of organic matter in biomass-burning smoke, *Proc. Natl. Acad.*  
133 *Sci. U.S.A.*, 116, 19336-19341, <https://doi.org/10.1073/pnas.1900129116>, 2019.  
134 Bauer, J. J., Yu, X.-Y., Cary, R., Laulainen, N., and Berkowitz, C.: Characterization of  
135 the Sunset semi-continuous carbon aerosol analyzer, *J. Air Waste Manag. Assoc.*,  
136 59, 826-833, <https://doi.org/10.3155/1047-3289.59.7.826>, 2009  
137 Pang, Y., Wang, Y., Wang, Z., Zhang, Y., Liu, L., Kong, S., Liu, F., Shi, Z., and Li, W.:  
138 Quantifying the fractal dimension and morphology of individual atmospheric soot  
139 aggregates, *J. Geophys. Res. Atmos.*, 127, [10.1029/2021jd036055](https://doi.org/10.1029/2021jd036055), 2022.  
140  
141
