# Supplementary material for: Morphological and optical properties of carbonaceous aerosol particles from ship emissions and biomass burning during a summer cruise measurement in the South China Sea
Source: Copernicus journal article supplement (doi:10.5194/egusphere-2023-1589), 2023-07-31
Supplement: Supplementary file [file egusphere-2023-1589-AC2-supplement.pdf]

1 **Response to reviewer 2**

2 Comments:

3 This paper investigated the morphology and optical properties of carbonaceous aerosols  
4 collected during a ship cruise campaign. The results can help improve the knowledge  
5 gap related to ship emissions and aerosol above the ocean. However, there are still many  
6 places that need to be improved. Many points need to be better explained, and the  
7 manuscript needs to be better organized, making me have difficulty understanding and  
8 validating the results. Please see my comments below. I recommend a major revision.

9 We thank the reviewer for valuable comments and suggestions. We have revised the  
10 manuscript accordingly. All revised points are indicated in red in the manuscript. The  
11 point-by-point responses are given below.

12 Major comments:

13 1. It is not very clear to me about your optical property measurements:

14 (1) For Aethalometer measurements, you must provide all necessary information, like  
15 data corrections. Aethalometer measures extinction, which is equal to absorption plus  
16 scattering. You should apply a correction for filter scattering based on your filter type.  
17 Moreover, did you do any corrections for multi-scattering effects due to particle selves?  
18 This can cause overestimations of absorption.

19 In this study, the absorption coefficient and BC concentrations were calculated  
20 according to the user's manual (page 30, manual version 1.54). Specifically, the  
21 absorption coefficients were calculated based on optical attenuation measurements at  
22 seven different wavelengths using a continuously loading filter in the employed  
23 Aethalometer AE33 (Zhao et al., 2020; Yus-Díez et al., 2021). Here, data corrections  
24 were performed for the AE33, including several factors such as the multiple scattering  
25 parameters ( $C(\lambda)=1.39$  for the specific filter type used in the study), the leakage factor  
26 ( $\zeta =0.01$ ), and the compensation parameters ( $K_{\min}=-0.005$  and  $K_{\max}=0.015$ ). We have  
27 now added the above information in lines 152-154, “.....through the filter tape (type  
28 8060) at a sample flow rate of  $5 \text{ L min}^{-1}$ . Data corrections were made for the employed  
29 Aethalometer AE33, considering the multiple scattering parameters ( $C(\lambda)=1.39$  for the

30 used filter type), the leakage factor ( $\zeta=0.01$ ), and the compensation parameters ( $K_{\min}=$   
31  $0.005$  and  $K_{\max}=0.015$ ).

32 In addition, we have also included equations for the BC calculation (Eqs. 2-3) in lines  
33 228-237.

34 (2) Moreover, some brown carbon can absorb at 880 nm, leading to overestimating BC  
35 if you consider only BC absorbs at 880 nm. This can be improved by assuming  
36  $AAE_{BC} = 1$  and applying fitting like  $babs(\lambda)=a \lambda^{AAE_{BC}} + b$   
37  $\lambda^{AAE_{BrC}}$  for all wavelengths. Otherwise, you should call these BC equivalent  
38 BC (eBC) since AE33 reports the equivalent mass of BC, which will absorb the same  
39 amount of light at that wavelength.

40 We agree with the reviewer that the BC derived from AE33 in this study should be  
41 denoted as equivalent BC (eBC) (Yus-Díez et al., 2021). We have now added a sentence  
42 to reflect the change of the notation in lines 149-150, “Note that the BC mass  
43 concentrations derived from AE33 are referred to as equivalent BC mass concentrations  
44 due to the light absorption of both BC and BrC at 880 nm.”

45 (3) It is not very clear to me how you measure optical EC. Could you provide more  
46 details about Sunset optical EC calculation? Does it use the same method as AE33?  
47 Since BrC might still significantly absorb at 660 nm (Cheng et al., 2019; Corbin et al.,  
48 2019) and you might not be able to correct multi-scattering, filter scattering, and loading  
49 effects related to filter-based optical measurements, it is essential to discuss your  
50 method. This is also related to OC/EC analysis since pyrolysis EC correction is based  
51 on transmission and reflection of 660 nm wavelength. Thus, OC/EC analysis typically  
52 overestimates EC (Cheng et al., 2019).

53 Optical EC concentrations are measured in the Sunset OC/EC analyzer based on the  
54 transmission of 660 nm wavelength light through the quartz fiber filter employed for  
55 sampling, similar to the AE33 for optical BC measurements. Optical EC is defined as  
56 the apparent EC on the filter based on a fixed absorption coefficient and the apparent  
57 absorbance. The absorption coefficient is applied according to the user’s manual of the  
58 Sunset OC/EC (Page 59-61). Both our study and a previous study (Brown et al., 2019)

59 showed that the optical EC concentrations (from Sunset) were comparable with the BC  
60 concentrations (from AE33). We admit that the resultant optical EC concentrations  
61 from the instrument output may be overestimated due to the limitation of the filter-  
62 based optical measurements. We have now revised the text considering the above  
63 information in lines 176-182, “The Sunset OC/EC analyzer also measures optical EC  
64 based on the transmission of 660 nm wavelength light through the quartz fiber filter  
65 employed for sampling, similar to the AE33 for optical BC measurements. Optical EC  
66 is defined as the apparent EC on the filter based on the measured apparent absorbance  
67 and the fixed absorption coefficient according to the user’s manual of the Sunset OC/EC.  
68 Both our study and a previous study (Brown et al., 2019) showed that the optical EC  
69 concentrations from Sunset were comparable with the BC concentrations from AE33.  
70 Note that the resultant optical EC concentrations from the instrument output may be  
71 overestimated due to the limitation of the filter-based optical measurements.”

72 (4) Also, did you convert measured OC and EC to organic and black carbon mass since  
73 the OC-EC analyzer reports carbon mass in organic and BC, which will be smaller than  
74 organic and BC mass due to excluding other elements like oxygen and nitrogen?

75 No, we did not. We only report the element carbon mass.

76 The Sunset OC/EC analyzer uses a modified NIOSH 5040 thermal-optical protocol as  
77 its default protocol. This protocol provides a relatively reliable determination of OC,  
78 EC, and the OCEC split. The thermal-optical protocol first evolves OC in pure helium  
79 (He), which is carried into a manganese dioxide oxidizing oven for conversion to carbon  
80 dioxide (CO<sub>2</sub>). The CO<sub>2</sub> is then quantified by determining its absorbance directly using  
81 a tunable red diode laser in a self-contained flow through non-dispersive infrared  
82 (NDIR) detector as it exits the oxidizing oven by the He carrier gas. EC is then desorbed  
83 in an oxygen (O<sub>2</sub>) blend carrier gas and quantified in the same way as OC. At the end  
84 of each run, an internal standard of known volume of methane (CH<sub>4</sub>) is injected and  
85 oxidized to CO<sub>2</sub> to ensure accurate quantification of OC and EC. Therefore, the OC and  
86 EC concentrations only contain the element carbon of the organic matters and the BC  
87 mass.

88 (5) It needs to be clarified which method you used for the AAE discussion in your  
89 paper. Also, the details of your AAE model need to be included, which makes me  
90 unable to understand your results. Moreover, for your AAE model, how did you decide  
91 on AAE values of 1 and 2 for FF and BB? I think these values are too low, and I suggest  
92 using a range instead of 1 value to account for the uncertainties.

93 We directly followed the AAE model in the user's manual, using AAE values of 1 and  
94 2 for FF and BB, respectively. Details of the AAE model and two methods for AAE  
95 calculation are included in the main text in lines 238-253.

96 The measured median AAE values for the classified periods (BMP, TMP, AMP, and  
97 SPP) ranged from 1.02-1.14 and 1.85-1.86 for two significant biomass events, which  
98 are very close to 1 and 2 for FF and BB, respectively.

99 Why do you have AAE values below 1 in Figure 11? Are these noises due to low  
100 absorbing particle loading?

101 The AAE values below 1 shown in Figure 11 are not from noises. To avoid ambiguity,  
102 we have added one sentence in the revision in lines 440-441, "The AAE values below  
103 1 in Figure 11 are not noises, in some cases due to aerosols from fossil fuel (Ezani et  
104 al., 2021) and in other cases, they can be even lower than 0.5 when paired with  
105 wavelengths of 470 and 660 nm (Laing et al., 2020)."

106 2. It is also not very clear to me in some single particle analyses:

107 (1) Do you measure max Feret or mean Feret diameter or Feret diameter measured at  
108 an angle of 90 degrees to max Feret diameter? How many BC particles have you  
109 analyzed? I also did not see the details about your  $D_f$  and lacunarity calculation.

110 In this study, as illustrated in Figure 5, we measured maximum Feret diameters for a  
111 total of 15,624 particles from a total of 34 representative examples, and this number is  
112 included in the text in lines 193-194. Among them, we selected 134 BC particles for  
113 the maximum Feret diameter and fractal analysis on pure BC particles or BC residue as  
114 shown in Figure 7. Here, we employed the ImageJ software to calculate  $D_f$  and  
115 lacunarity using the Fraclac plugin. A detailed description of  $D_f$  and lacunarity  
116 calculations are included in Section 2 of the SI.

117 (2) For your TEM imaging, I am very surprised that all organics can be evaporated at  
118 only 120 kV after beam focusing since the evaporation should occur during the vacuum  
119 process, and beam damage is typically not like this (typically for sulfate, and you will  
120 see some residual as the empty frame). I never see coating removed that completely,  
121 even with 300 kV acceleration voltage. It only happens during heating TEM  
122 experiments by heating the substrate to a few hundred °C. Did you do EDX mapping  
123 on these particles to see spatial distribution in the particles? It will be helpful to  
124 determine particle types based on both shape and elemental composition. Your EDX  
125 spectrum only shows a few positions, which might not represent the whole particle.

126 We agree with the reviewer that organic coatings cannot be completely removed under  
127 the electron beam with an acceleration voltage of 120 kV. From the example images  
128 shown in the main text (Figure 6c) and the SI (Figure S7), we can see significant  
129 residues of particles after beam focus with the acceleration voltage of 120 kV.  
130 Unfortunately, we could not perform EDX mapping to get the shape and composition  
131 for individual particle due to the limitation of the TEM instrument employed in this  
132 study. Instead, we obtained the EDS spectra by focusing the beam on the center of the  
133 particle. We should point out that a 120 kV accelerating electron beam may be  
134 sufficiently powerful for the analysis of aerosol particles in TEM, as supported by  
135 Adachi et al. (2017).

136 We notice that no significant coatings remained as shown in Figure 6a, b, e and f for  
137 the BC fractals. However, these BC particles contained thin coatings because they are  
138 collected from very fresh emissions of the own ship during ship stop or of other ships  
139 during navigation. We have now revised the caption of Figure 8 in lines 915-918, “**The**  
140 **EDS spectra were collected by focusing the electron beam in the TEM and the**  
141 **illuminated area covers the center of the particle for elemental analysis.**”

142 For tar ball particles, did you observe individual tar balls and tar ball aggregates (see  
143 Giroto et al., 2018)? Did you take tilted view images to confirm these round particles  
144 are spherical since they might not be domelike and flat (see Cheng et al., 2021)? Could  
145 you estimate the number fraction of tar balls in the samples?

146 In this study, we did not observe individual tar balls but only tar balls mixed with other  
147 components. When taking the TEM images, we did tilt the sample holder at an angle of  
148 25° for thorough observation. We estimate an approximately 11.8% of tar balls in the  
149 samples. We have now added the relevant information in line 145, “The substrate holder  
150 of TEM was tilted 25° for thorough inspection during imaging and EDS analysis.” and  
151 in lines 377-380 in the revision, “Tar balls were frequently observed during the  
152 campaign with an estimated sample fraction of about 11.8%. Fractal-like tar ball  
153 aggregates were usually found in wildfire smokes (Girotto et al., 2018); however, in  
154 this study, spherical tar ball particles were observed in the marine atmosphere and were  
155 mixed with sea salt (Fig. 8a and d for TEM image and EDS spectrum, respectively),  
156 organic carbon and sulfate (Fig. 8b and e) from the samples collected on May 27 during  
157 navigation.”

158 (3) Could you add more discussion on how you determine aging and fresh particles  
159 based on TEM images? Compressed BC is typically more aged and atmospherically  
160 processed, and fractal soot is fresh. Moreover, sulfate (aqueous processing) and less  
161 viscous organic coating can be indicators of aging. Did you observe this difference in  
162 your navigation and stop cases? Moreover, you should observe bimodal distribution in  
163 stop cases.

164 We agree with the reviewer regarding the differences between aged and fresh BC. We  
165 have now added more discussion to reflect the reviewer’s points in the revision (lines  
166 354-359), “Comparatively, a mixture of aged BC particles and much larger fresh BC  
167 particles as well as smaller scattered BC particles during stop were found (Fig. 6d-f),  
168 which were likely emitted from other ships (Fig. 6d) and the research vessel (e, f). These  
169 TEM images showed that the compressed BC particles are typically more aged and  
170 atmospherically processed, while the fractal BC particles are fresh. Moreover, EDS  
171 analysis showed that sulfate formed from aqueous processes and less viscous organic  
172 coating indicate an aging process. Those BC particles with Feret diameters larger than  
173 2 μm during stop were fractal aggerates which could unlikely survive due to deposition  
174 during long-range transport.”

175 We also agree with the reviewer that a bimodal distribution should be observed during  
176 stop. However, we couldn't successfully obtain a bimodal or multi-peak fit for the data  
177 of the stop cases using multi-peak fitting function in the Igor Pro software, as shown in  
178 Figure S6. We believe that single peak fitting best described the distribution in our stop  
179 cases, as illustrated in Figure 5. To clarify this point, we have added sentences in lines  
180 335-337 in the revision, "Note that we could not successfully obtain a bimodal or multi-  
181 peak fit for the data of the stop cases using multi-peak fitting function in the Igor Pro  
182 software, as shown in Figure S6. Hence, we believe that single peak fitting best  
183 described the distribution in our stop cases, as illustrated in Figure 5." and have included  
184 Figure S6 in the SI.

185 3. I got lost in the different classifications of your samples. Why don't you use the  
186 same classification? Moreover, the classification for the campaign period should not  
187 class SPP as an independent period since it is a subset of others.

188 Here, we classified the samples according to both temporal and spatial variations during  
189 the campaign. For online sampling, we focused on the differences between local  
190 emissions and long-range transport sources. For offline single particle analysis using  
191 TEM, we then focused on the influence during ship stop and navigation. We classified  
192 SPP as a special period since it could provide meaningful comparisons of fresh ship  
193 (research vessel) emissions with other scenarios and cases in term of the light  
194 absorption properties. Hence, we think the classification is appropriate and reasonable.  
195 We have now revised the text in lines 323-325, "SPP (ship pollution period), ~35% of  
196 the online measurement data could be attributed to this category in this study due to the  
197 interference from the research vessel own emissions."

198 4. I suggest adding a table in either the main text or SI to show the thresholds you  
199 used to identify different sources,

200 Per the reviewer's suggestion, we have included Table 1 which outlines the  
201 classification of observation periods and the wind directions. We believe that it can  
202 serve as a reference for the thresholds to identify different sources. We have included  
203 the text in lines 318-325 to reflect the changes, "Here, we classified the campaign period

204 into several groups based on the cruise route, change of wind direction during monsoon,  
205 backward trajectories, and ship pollution, as listed in Table 1: (1) BMP-1 (before  
206 monsoon period 1), AB route mainly with northeast wind direction during May 05–09;  
207 (2) BMP-2, B→C→D route close to the Philippines primarily with southeast wind  
208 direction during May 10–22; (3) BMP-3, D→E close to mainland China with the same  
209 wind direction as BMP-2 during May 23–26; (4) TMP (transition monsoon period), EB  
210 route with south wind direction during May 27–Jun 01; (5) AMP (after monsoon period),  
211 B→D→A route with southwest wind direction during June 02–09; (6) SPP (ship  
212 pollution period), ~35% of the online measurement data could be attributed to this  
213 category in this study due to the interference from the research vessel own emissions.”  
214 Your figure numbers in the main text should be checked carefully since some places  
215 refer to wrong figures.

216 We have thoroughly checked the figure numbers in the revision and the SI.

217

218 Specific comments:

219 1. L50-51, “Carbonaceous aerosols ... 2020).” BrC is a special subset of OC, so it  
220 should not be parallel with OC and BC.

221 The sentence has been revised by removing “and brown carbon (BrC)” in the revision  
222 (lines 45-46), “Carbonaceous aerosols (e.g., organic carbon (OC), elemental carbon  
223 (EC)/black carbon (BC)) profoundly impact regional and global climate (Corbin et al.,  
224 2019; Lu et al., 2020; Rabha and Saikia, 2020).”

225 2. L59-61, “BrC typically ... respectively).” This is not true. BC should have a  
226 higher imaginary part or MAC from Visible to NIR-IR than BrC.

227 These sentences have been removed in the revision.

228 3. L64-66, “These particles ... 2005).” Tar balls belong to BrC because they are  
229 light absorbing organic.

230 This sentence has been modified in the revision (lines 57-58), “These particles also  
231 belong to BrC because they are light-absorbing organics (Adachi et al., 2019; Hand et  
232 al., 2005).”



233 4. L87-88, “When BC ... 2021).” Well internally mixed means different species  
234 are homogeneously distributed inside a particle, which is impossible for BC and other  
235 materials. Also, the shielding and lensing effects should depend on the coating thickness  
236 (Lack and Cappa, 2010).

237 These related sentences have been revised according to the reviewer’s suggestion (lines  
238 69-72), “The shielding and lensing effects depend on the coating thickness over BC  
239 (Lack and Cappa, 2010). When BC is well internally mixed with BrC, its total  
240 absorption enhancement becomes smaller than the enhancements of not well mixed  
241 counterparts due to the absorptive coating that acts as a shield (Feng et al., 2021).  
242 Moreover, it is impossible for BC and other materials to be homogeneously distributed.”

243 5. DKL-2 should be a two-stage cascade impactor. What is the cut-off size for the  
244 other stage? Are there any references to validate the cut-off size? Section S1 is not  
245 necessary if someone has already published these results. Moreover, Section S1 is a  
246 theoretical calculation. Did you test the cut-off size? Did you only collect on stage with  
247 50% cut-off = 0.2  $\mu\text{m}$ ? Why did it not include the other stage?

248 The sampler (DKL-2) employed in this study is a single-stage cascade impactor,  
249 capable of collecting either fine or coarse particles by a 0.3 mm or 0.5 mm diameter  
250 nozzle, respectively. It can be utilized with one stage (either fine or coarse particles) at  
251 any given time, which is different from the two-stage cascade impactor (Adachi et al.,  
252 2017). The sampler was utilized in previous studies without mentioning the validation  
253 of the cut-off size (Chen et al., 2023; Dong et al., 2018) and hence we included a  
254 theoretical cut-size estimation in Section 1 of the SI. However, we did not carry out  
255 experiments to test the calculated cut-off sizes. Here, we collect fine particles with a  
256 0.3 mm nozzle for the analysis of BC particles, obtaining a calculated 50% cut-off size  
257 at 0.2  $\mu\text{m}$ . To clarify this, we have now revised sentences in lines 133-138 to include  
258 the reviewer’s suggestions, “Single particles were collected on the TEM grids (3.05 mm  
259 I.D., copper meshed and covered with lacey carbon film) located on the front deck  
260 during ship navigation and stop using a single-stage particle sampler (DKL-2, Genstar  
261 Electronic Technology Co., Ltd., China) which is the same as other studies (Chen et al.,

262 2023; Dong et al., 2018; Liu et al., 2021; Pang et al., 2022). The sampling flow rate and  
263 time were set at 1 L min<sup>-1</sup> and 10 min, respectively, for each collection. The nozzle  
264 diameter of this single-cascade impactor is 0.3 mm. The particles with aerodynamic  
265 diameters above 0.2 µm were collected with a collection efficiency of 50%, assuming  
266 a particle density of 1.5 kg m<sup>-3</sup> (Marple and Olson, 2011).”

267 6. L153-154, “The BC mass ... time resolution.” I do not think AE33 has a time  
268 resolution of 1 second.

269 We used one minute time resolution in this study for the AE33 measurements. We have  
270 modified the text in the revision (lines 148-149), “The BC mass concentrations were  
271 measured by an aethalometer (Model AE33, Magee Scientific, USA) with a time  
272 resolution of one minute.”

273 7. L176-177, “Here, ... campaign.” How do you determine this value? These  
274 should be instrumenting noise or contamination, not your detection limit. You should  
275 use a standard with a known concentration to calibrate the detection limit.

276 We agree with the reviewer that the three standard deviation of those blank  
277 measurements should correspond to instrument noises or contaminations rather than the  
278 instrument detection limit. We have now revised the sentence in lines 173-176 in the  
279 revision, “Here, we estimated the instrument noises (including contamination) of 0.15,  
280 and 0.012 µg m<sup>-3</sup> for OC and EC based on 26 effective blank measurements with 3  
281 times the standard deviation (3σ) during the campaign. The limit of detection (LOD) for  
282 OC and EC is 0.18 and 0.19 µg m<sup>-3</sup>, respectively, calculated as three times the standard  
283 deviation of replicate measurements of a standard sucrose solution with a carbon  
284 content of 10.516 µg m<sup>-3</sup>.”

285 8. L178-180, “The measurements ... the ship.” Do you have any references for  
286 these instruments? What is the time resolution? What are their uncertainties?

287 Per the reviewer’s suggestions, we have now included the relevant information in lines  
288 184-188 in the revision, “The measurements of solar radiation (SR), temperature (T),  
289 pressure (P), relative humidity (RH), relative wind direction (RWD), and relative wind  
290 speed (RWS) were provided by the automatic weather station (AWS430, Vaisala Inc.,

291 Finland) (Song et al., 2022) equipped on the front deck of the research vessel. This  
292 station comprises a range of integrated sensors, including a wind speed and direction  
293 sensor (model WMT702), a temperature and humidity sensor (model HMP155), and an  
294 atmospheric pressure sensor (model BARO-1). The cruise route for ship navigation is  
295 from the global positioning system (GPS) onboard the ship (Seapath 330+, Kongsberg  
296 Inc., Norway).”

297 Detailed information of the time resolution and accuracy is included in section in the  
298 SI (Section 11), “The time resolutions for the meteorological and GPS data are 3  
299 seconds. The position accuracies for X and Y axes are 1 cm +1 ppm RMS (root mean  
300 square), and for Z axis is 2 cm +1 ppm RMS. The accuracy of wind speed and wind  
301 direction is  $\pm 0.2 \text{ m s}^{-1}$  (or 3% of reading) and  $\pm 2^\circ$ , respectively. The accuracy of  
302 temperature at 20–60 °C is  $\pm (0.07 + 0.0025 \times \text{temperature})$  °C. The accuracy of relative  
303 humidity at -20 to + 40 °C is  $\pm (1 + 0.008 \times \text{reading})$  %RH. The accuracy of pressure  
304 with the factory calibration is  $\pm 0.15 \text{ hPa}$  (Class A).”

305 9. L197-198, “The navigation ... TEM samples).” Is the relative wind direction  
306 relative to the North or ship direction? How did you determine the criteria for wind  
307 speed and direction?

308 The reviewer is correct. The wind direction is referenced to the North, whereas the  
309 relative wind direction is aligned with the ship's orientation. The automatic weather  
310 station provides data such as ship heading (orientation), the true wind speed/direction,  
311 and the relative wind speed/direction. The relative wind speed and direction are  
312 converted by vector calculation. We have now included information on the relative  
313 wind direction/speed in lines 217-220 in the revision, “The wind direction (speed) and  
314 relative wind direction (speed) are calculated by Eq. (1) (Aijjou et al., 2020).

$$315 \quad V_R = \sqrt{V_s^2 + V_w^2 + 2 * V_s * V_w * \cos \alpha} \quad (1)$$

316 where  $V_R$  is the relative wind direction (speed),  $V_s$  is the ship direction (speed),  $V_w$  is  
317 the true wind direction (speed),  $\alpha$  is the angle between the ship heading and the true  
318 wind direction.”

319 10. L203-204, “Here, we ... transport.” Could you provide details about how did  
320 you distinguish these? Based on chemical composition? Other ship emissions might not  
321 be easy to separate from your ship emission.

322 We agree with the reviewer that other ship emissions might not be easy to separate from  
323 the own ship emission and we employ the following criteria, which have been included  
324 in lines 223-226 in the revision, “Here, we distinguished the own ship emissions  
325 (research vessel) from those of other ships or long-range transport based on the  
326 following criteria: low relative wind speed ( $< 5 \text{ m s}^{-1}$ ), relative wind direction  
327 encompassing ship exhaust ( $80\text{--}280^\circ$ ), and a substantial AE33-derived hourly averaged  
328 BC mass concentration ( $>2 \mu\text{g m}^{-3}$ ). Other ship emissions far from the research vessel  
329 are treated as a part of the transported air masses in this study.”

330 L207-208, “Here, we ... variations.” I suggest using a subscript to indicate BC mass  
331 from OC-EC or AE33. It is unclear to me.

332 In this study, the BC data obtained from the AE33 are referred to as BC, while data  
333 from the OC/EC analyzer are denoted as thermal OC, thermal EC, and optical EC. The  
334 optical EC is not extensively discussed and does not play a critical role in our analysis.  
335 Therefore, we believe that the employed descriptive names should provide enough  
336 clarity.

337 To avoid the ambiguity, we have now revised the text in lines 228-229, “In this study,  
338 BC data obtained from the AE33 are referred to as BC, while data from the OC/EC  
339 analyzer are denoted as thermal OC, thermal EC, and optical EC.”

340 11. Figure 1. The color bar needs to be clarified. I suggest using colors with higher  
341 color resolution.

342 The color resolution of Figures 1, 4, and S3 has been upgraded.

343 12. L250-252, “It should be .... html.en.” It is not shown as an increase in wind  
344 speed and RH and a decrease in pressure in Figure 2 for the typhoon period. Could you  
345 explain that? Moreover, I suggest adding a SI figure to show the typhoon.

346 We thank the reviewer for pointing this out. We have included a map for the typhoon  
347 track and a chart for the central pressure of the typhoon in the SI (Section 5, Figure S5).

348 In addition, we have now addressed the reviewer’s concern in lines 292-297 in the  
349 revision, “The typhoon was initiated at 02:00 local time on May 31 and dissipated at  
350 14:00 on June 05, 2021 (Figure S5). It passed over our cruise route from June 03 to  
351 June 05, 2021. While no significant increase of absolute wind speed was seen in Figure  
352 2, a significant increase of relative wind speed was shown in Figure S2, along with an  
353 obvious decrease of atmospheric pressure during the typhoon period (Figure S5). The  
354 measured relative humidity increased from May 27 to June 01, prior to the presence of  
355 the typhoon, which can be attributed to the decrease of ambient temperature during this  
356 period.”

357 13. L253-257, “Figure 3 ... 80-280”. I expect a detailed discussion of Figure 3  
358 since that tells lots of important information. Why do you see more BC after the  
359 monsoon, which I expect pollution will be removed by rain? Also, why do you see more  
360 BC before May 8th? Or OC, did you observe any diurnal trend or other trend? I suggest  
361 labeling the sampling period and path in Figures 2 and 3 by adding shaded areas—same  
362 suggestion for all other time serial figures.

363 We agree with the reviewer. We have now updated Figures 2, 3, 13, and S2 with shaded  
364 areas. In addition, we have added more discussion on Figure 3 in lines 303-307 in the  
365 revision, “Before May 08 and after June 05, higher UVPM, OC, and EC concentrations  
366 were observed, which can be attributed to significant fresh ship emissions from the  
367 research vessel, as evidenced by simultaneous higher BC concentrations. Similar spikes  
368 in BC concentrations were observed during other measurement periods, either  
369 preceding or following the monsoon period, which were caused by emissions from the  
370 frequent stops and starts of the ship. Note that no significant diurnal trend for OC was  
371 observed during those aforementioned periods.”

372 14. L262-264, “The choice of ... 2007).” You should adjust the bin width to make  
373 the distance between each bin is constant in log scale. I suggest using same bin size to  
374 help reader visualize easily.

375 We have included a sentence to clarify this point in lines 329-330 in the revision, “The  
376 distribution is represented with histograms starting at 50 nm, a width interval of 20 nm,  
377 and a bin number of 200.”

378 15. L275-277, “The BC ... 2020a).” It is hard to see the coating in a and c. Both  
379 look like embedded to me. Do you have better images?

380 Figure 6a shows a typical embedded type, while a core-shell type in Figure 5c. Please  
381 refer to lines 345-347 in the revision, “The BC particles collected during navigation are  
382 in the embedded (a), external (b), or core-shell (c) mixing states classified with the  
383 methods which are based on single particle analysis of island and mountain samples  
384 across East China Sea and Japan (Adachi et al., 2014; Sun et al., 2020a).” In addition,  
385 we have also included images captured just before and after electron focus in the SI  
386 (Section 7, Figures S7c and S7f).

387 16. L284-285, “Comparatively ... (e,f).” How did you know this? This is not clear  
388 to me.

389 We have now added more description in lines 354-361 in the revision, as have been  
390 addressed in the above main question #1 (3), “Comparatively, a mixture of aged BC  
391 particles and much larger fresh BC particles as well as smaller scattered BC particles  
392 during stop were found (Fig. 6d-f), which were likely emitted from other ships (Fig. 6d)  
393 and the research vessel (e, f). These TEM images showed that the compressed BC  
394 particles are typically more aged and atmospherically processed, while the fractal BC  
395 particles are fresh. Moreover, EDS analysis showed that sulfate formed from aqueous  
396 processes and less viscous organic coating indicate an aging process.”

397 17. L286-287, “In addition, ... (Fig. S5).” They could also be condensation of  
398 organic during cooling after emitted from engine if you do not see them spread out  
399 (high viscous).

400 We agree with the reviewer that the particles could also be condensation of organic  
401 from engine emissions. We have now added more discussion in lines 359-361 in the  
402 revision, “In addition, heavily coated internal BC particles were found during stop due  
403 to the mixing between ship pollution and the marine air (Fig. S9). Moreover, such

404 particles could also be condensation of organics during the cooling process after they  
405 were emitted from the ship engine.”

406 18. Figure 6: Does Fig 6 just show results from a portion of BC you imaged? If yes,  
407 why don't you show all of them? Do you think your results is statistically significant  
408 since your sample number is very low.

409 We have now added more data points in Figure 7 to show all the BC particles (a total  
410 of 134) from the 34 TEM grid samples observed by the TEM. Similar results were  
411 obtained from other particles collected on a distant island sampling in East China Sea  
412 (Figure S16). We have now added a sentence in lines 372-373 in the revision, “Despite  
413 a total of 134 BC data points shown in Figure 7, the results are still statistically  
414 meaningful due to the wide range of BC sizes covered in our analysis.”

415 L294-295, “Figure 6 ... during transport.” This is unclear to me. Please explain this in  
416 detail. Did you observe smaller particles have more coating? If yes, have you tried to  
417 quantify the size change after removing coating?

418 We should point out that the particles in Figure 7 include pure BC and BC without thick  
419 coatings. We cannot conclude that smaller particles have more coatings. Instead, we  
420 observed that most aged BC particles were small after long-range transport, regardless  
421 they were initially small or became smaller due to the collapse of large BC aggregates.  
422 We did not quantify the size change after removing coating due to the limitation of the  
423 employed TEM instrument. We have now revised the main text in lines 364-374, “The  
424 BC particles showed narrower Feret diameters (229–2557 nm) during navigation than  
425 those (78-2926 nm) of BC from the own ship during stop. The  $D_f$  values during  
426 navigation were in a range of 1.28–1.77 with a median of 1.61, while the  $D_f$  values  
427 during stop were 1.43–1.76 with a median of 1.61, indicating no significant differences  
428 of  $D_f$  for the exposed BC particles during navigation and stop. Note that the particles in  
429 Figure 7 include pure BC and BC without thick coatings. These particles were exposed  
430 to the electron beam and volatile coatings were removed so that the morphology of BC  
431 was clearly shown regardless of the mixing state of the original BC particles (Figure  
432 S7). Most BC particles were below 1  $\mu\text{m}$  in Feret diameter during navigation (Figure

433 7), while their sizes cover a wide range below 3  $\mu\text{m}$  during stop, implying that the aged  
434 BC particles become smaller after long-range transport. Despite only a total of 134 BC  
435 data points shown in Figure 7, the results are still statistically meaningful due to the  
436 wide range of BC sizes covered in our analysis. Note that the size change of a BC  
437 particle cannot be determined because the original size of the particle is unknown before  
438 the removal of the coatings.”

439 19. L296-298, “Comparatively, ... particles.” I did not see significantly difference  
440 in lacunarity by looking at the figure. I suggest making a plot as size change vs  
441 lacunarity to support your statement.

442 We have addressed this point in the question above. Since size change could not be  
443 determined, we cannot provide a plot of size change vs lacunarity as suggested by the  
444 reviewer.

445 20. Figure 7, I cannot see your tar ball. Please mark them in your figures. Also, the  
446 scales and text in figures a-c are very difficult to read. Please change a color. Same  
447 comments for Figure S9. Fig. 7c looks like thick OC coated soot since I did not see any  
448 beam damage, which is typically generated during engine emission. Do you refer  
449 amorphous carbon agglomerates to OC or soot?

450 Per the reviewer’s suggestion, we have revised the images in Figures 8 and S8, along  
451 with their captions. In addition, we have now added a sentence in lines 380-381 in the  
452 revision, “In contrast, the particles collected on June 01 were found to be amorphous  
453 carbon agglomerates (Fig. 8c and f) which were referred to OC.”

454 21. 3-3.4, “The difference ... origin.” Which difference you are referring here? Size,  
455 number, shape, or something else?

456 We have now clarified this point in lines 383-384 in the revision, “The shape difference  
457 between the tar ball spheres and the amorphous carbon agglomerates may be related to  
458 the type of biomass burning or the origin of the ship engines.”

459 22. Section 3.3. I feel it might be better to move Section 3.3 before Section 3.1.

460 We agree with the reviewer and Section 3.3 have been merged into Section 3.1. We  
461 have also rearranged all the figures accordingly.



462 23. L327-347, “The BC concentrations ... Sun et al., 2023).” This paragraph does  
463 not fit here and should be moved to section 3.5. BC from AE33 does not agree with  
464 OC/EC, but their trend agrees. Moreover, I am not sure how could you get optical EC  
465 time resolution of 1 min since that should be only measured before thermal process.  
466 The R square is also very low for the fitting of AE33 BC and optical EC. Higher AE33  
467 BC and optical EC is because overestimation by assuming only BC absorbing at long  
468 wavelength and multi-scattering effects.

469 We agree with the reviewer and have now moved this paragraph. We have addressed  
470 the concern regarding optical EC in the main question #1 (3). Furthermore, the Sunset  
471 OC/EC analyzer determines optical EC by continuously monitoring laser transmission  
472 data at a wavelength of 660 nm through a quartz filter over the analysis duration. The  
473 optical EC data are automatically saved with a time interval of 1 minute by the  
474 instrument internal software. More detail on the optical EC measurement can be found  
475 in Bauer et al. (2012).

476 24. Figure 9 is not clear to me. What is the x axis? Should you also have a box plot  
477 for EC rather than a single value? You can show two plots (one for OC/EC ratio and  
478 the other one for EC) for all periods combined. The whisker should not touch axis. Also,  
479 I suggest using violin plot instead of box so that you can show distribution.

480 We thank the reviewer for the suggestion and we have now modified Figure 9 using  
481 violin plots to show the median and distribution of both OC/EC ratios and EC  
482 concentrations in lines 395-396, “Figure 9 shows the distribution of the OC/EC ratios  
483 and the corresponding EC concentrations” and in lines 399-402, “Compared with  
484 Figure 9d, the scattered higher OC/EC ratios in Figure 9a/b/c are caused by the very  
485 low EC concentrations. The presence of extremely low EC concentrations, often falling  
486 below or near the detection limit, can introduce discrepancies in the calculation of the  
487 OC/EC split, ultimately resulting in inaccurate EC concentrations (Bauer et al., 2009).”

488 25. L333-334, “Notably ... during SPP.” Please add uncertainties.

489 Here, we show the median rather than the mean of the mass concentrations so we don't  
490 think we can provide uncertainties for this statement.

491 Figure 10. Please add more tick labels in b and c since current version does not tell the  
492 timestamp.

493 We have updated Figure 10(b, c) according to the reviewer's suggestion.

494 26. 369-371, "Notably, ... (Fig. 10a)." Why do you have a range of BC mass  
495 concentration? Is this the BC mass concentration at each wavelength? AE33 reports  
496 mass equivalent to the mass of BC absorbs same amount of light, not real BC mass.

497 We agree with the reviewer that the reported mass is the mass equivalent to the BC  
498 mass absorbed at certain wavelengths. We have now modified the text in lines 435-440  
499 in the revision and emphasized those concentrations are wavelength- dependent, "The  
500 BC mass concentration ranged from 1.45 to 3.62  $\mu\text{g m}^{-3}$  during biomass burning events  
501 based on light absorption at wavelength of 880 nm. The mass concentration in Figure  
502 10 corresponds to BC mass concentration obtained at each wavelength. We have  
503 emphasized that BC mass concentration in this study is equivalent BC at individual  
504 wavelength. Notably, efficient light absorption of BrC in the range at 370–660 nm was  
505 observed during the biomass burning events, while no significant wavelength-  
506 dependent BC concentrations were found during the own ship pollution (Fig. 10a)."

507

508 **References (from reviewer):**

509 Cheng, Z., Atwi, K., Onyima, T., Saleh, R., 2019. Investigating the dependence of light-  
510 absorption properties of combustion carbonaceous aerosols on combustion  
511 conditions. *Aerosol Sci. Technol.* 53, 419–434.

512 <https://doi.org/10.1080/02786826.2019.1566593>

513 Cheng, Z., Sharma, N., Tseng, K.P., Kovarik, L., China, S., 2021. Direct observation  
514 and assessment of phase states of ambient and lab-generated sub-micron particles  
515 upon humidification. *RSC Adv.* 11, 15264–15272.

516 <https://doi.org/10.1039/d1ra02530a>

517 Corbin, J.C., Czech, H., Massabò, D., de Mongeot, F.B., Jakobi, G., Liu, F., Lobo, P.,  
518 Mennucci, C., Mensah, A.A., Orasche, J., Pieber, S.M., Prévôt, A.S.H., Stengel,  
519 B., Tay, L.-L., Zanatta, M., Zimmermann, R., El Haddad, I., Gysel, M., 2019.

520 Infrared-absorbing carbonaceous tar can dominate light absorption by marine-  
521 engine exhaust. *npj Clim. Atmos. Sci.* 2. [https://doi.org/10.1038/s41612-019-](https://doi.org/10.1038/s41612-019-0069-5)  
522 0069-5

523 Giroto, G., Bhandari, J., Gorkowski, K., Scarnato, B. V., Capek, T., Marinoni, A.,  
524 Veghte, D.P., Kulkarni, G., Aiken, A.C., Dubey, M., Mazzoleni, C., 2018. Fractal-  
525 like Tar Ball Aggregates from Wildfire Smoke. *Environ. Sci. Technol. Lett.* 5,  
526 360–365. <https://doi.org/10.1021/acs.estlett.8b00229>

527 Lack, D.A., Cappa, C.D., 2010. Impact of brown and clear carbon on light absorption  
528 enhancement, single scatter albedo and absorption wavelength dependence of  
529 black carbon. *Atmos. Chem. Phys.* 10, 4207–4220. [https://doi.org/10.5194/acp-](https://doi.org/10.5194/acp-10-4207-2010)  
530 10-4207-2010

531

### 532 **References (from authors)**

533 [Adachi, K., Sedlacek, A. J., Kleinman, L., Chand, D., Hubbe, J. M., and Buseck, P. R.:  
534 Volume changes upon heating of aerosol particles from biomass burning using  
535 transmission electron microscopy, \*Aerosol Sci. Technol.\*, 52, 46-56,  
536 10.1080/02786826.2017.1373181, 2017.](#)

537 [Bauer, J. J., Yu, X.-Y., Cary, R., Laulainen, N., and Berkowitz, C.: Characterization of  
538 the Sunset semi-continuous carbon aerosol analyzer, \*J. Air Waste Manag. Assoc.\*,  
539 59, 826-833, 10.3155/1047-3289.59.7.826, 2009.](#)

540 [Brown, S., Minor, H., O'Brien, T., Hameed, Y., Feenstra, B., Kuebler, D., Wetherell, W.,  
541 Day, R., Tun, R., Landis, E., and Rice, J.: Review of Sunset OC/EC instrument  
542 measurements during the EPA's Sunset carbon evaluation project, \*Atmosphere\*  
543 \*\(Basel\)\*, 10, 287, 10.3390/atmos10050287, 2019.](#)

544 [Chen, X., Ye, C., Wang, Y., Wu, Z., Zhu, T., Zhang, F., Ding, X., Shi, Z., Zheng, Z., and  
545 Li, W.: Quantifying evolution of soot mixing state from transboundary transport  
546 of biomass burning emissions, \*iScience\*, 26, 108125, 10.1016/j.isci.2023.108125,  
547 2023.](#)

548 [Dong, Z., Kang, S., Qin, D., Shao, Y., Ulbrich, S., and Qin, X.: Variability in individual](#)

549 particle structure and mixing states between the glacier–snowpack and atmosphere  
550 in the northeastern Tibetan Plateau, *The Cryosphere*, 12, 3877-3890, 10.5194/tc-  
551 12-3877-2018, 2018.

552 Drinovec, L., Močnik, G., Zotter, P., Prévôt, A. S. H., Ruckstuhl, C., Coz, E., Rupakheti,  
553 M., Sciare, J., Müller, T., Wiedensohler, A., and Hansen, A. D. A.: The "dual-spot"  
554 Aethalometer: An improved measurement of aerosol black carbon with real-time  
555 loading compensation, *Atmos. Meas. Tech.*, 8, 1965-1979, 10.5194/amt-8-1965-  
556 2015, 2015.

557 Ezani, E., Dhandapani, S., Heal, M. R., Praveena, S. M., Khan, M. F., and Ramly, Z. T.  
558 A.: Characteristics and source apportionment of black carbon (BC) in a suburban  
559 area of Klang Valley, Malaysia, *Atmosphere*, 12, 10.3390/atmos12060784, 2021.

560 Laing, J. R., Jaffe, D. A., and Sedlacek, I. I. I. A. J.: Comparison of Filter-based  
561 Absorption Measurements of Biomass Burning Aerosol and Background Aerosol  
562 at the Mt. Bachelor Observatory, *Aerosol Air Qual. Res.*, 20, 663-678,  
563 10.4209/aaqr.2019.06.0298, 2020.

564 Liu, X., Zhu, R., Jin, B., Zu, L., Wang, Y., Wei, Y., and Zhang, R.: Emission  
565 characteristics and light absorption apportionment of carbonaceous aerosols: A  
566 tunnel test conducted in an urban with fully enclosed use of E10 petrol, *Environ.*  
567 *Res.*, 216, 10.1016/j.envres.2022.114701, 2023.

568 Song, X., Xie, X., Qiu, B., Cao, H., Xie, S.-P., Chen, Z., and Yu, W.: Air-Sea Latent  
569 Heat Flux Anomalies Induced by Oceanic Submesoscale Processes: An  
570 Observational Case Study, *Front. Mar. Sci.*, 9, 10.3389/fmars.2022.850207, 2022.

571 Yus-Díez, J., Bernardoni, V., Močnik, G., Alastuey, A., Ciniglia, D., Ivančič, M., Querol,  
572 X., Perez, N., Reche, C., Rigler, M., Vecchi, R., Valentini, S., and Pandolfi, M.:  
573 Determination of the multiple-scattering correction factor and its cross-sensitivity  
574 to scattering and wavelength dependence for different AE33 Aethalometer filter  
575 tapes: a multi-instrumental approach, *Atmos. Meas. Tech.*, 14, 6335-6355,  
576 10.5194/amt-14-6335-2021, 2021.

577 Zhao, G., Yu, Y., Tian, P., Li, J., Guo, S., and Zhao, C.: Evaluation and Correction of

578 the Ambient Particle Spectral Light Absorption Measured Using a Filter-based  
579 Aethalometer, *Aerosol Air Qual. Res.*, 20, 1833-1841, 10.4209/aaqr.2019.10.0500,  
580 2020.  
581
